# Supplementary material for: Comparison of methane emission estimates from multiple measurement techniques at natural gas production pads
Source: Oxford University Press journal article supplement (doi:10.1525/elementa.266), 2017-01-01
Supplement: elementa-5-266-s2.xlsx [file elementa-5-266-s2.xlsx]

## Sheet: OnsiteMeasurements
Facility ID	Measurement Team	Measurement Date	EquipmentCategory	ComponentCategory	HiFlow Rate kgPerHour	Emission Rate Exception
926	Team A	2015-09-28	Separator	Regulator	0.0122371	BelowHiFlowRange
927	Team A	2015-09-28	Tank	Tank	0.00815808	BelowHiFlowRange
927	Team A	2015-09-28	Tank	Tank	0.00407904	BelowHiFlowRange
927	Team A	2015-09-28	Separator	Regulator	0	BelowHiFlowRange
927	Team A	2015-09-28	Separator	Regulator	0	BelowHiFlowRange
927	Team A	2015-09-28	Separator	Regulator	0	BelowHiFlowRange
684	Team A	2015-09-29	Compressor	RodPackingVent	0.556789	None
684	Team A	2015-09-29	Compressor	LiquidLevelController	0.106055	None
684	Team A	2015-09-29	Compressor	PRV	0.0224347	BelowHiFlowRange
808	Team A	2015-09-29	Separator	PneumaticController	0.0183557	BelowHiFlowRange
808	Team A	2015-09-29	Tank	Tank	0	BelowHiFlowRange
1484	Team A	2015-09-29	NA	NA	NA	NonDetect
1600	Team A	2015-09-29	WellHead	Valve	0	BelowHiFlowRange
1600	Team A	2015-09-29	WellHead	Connector	0	BelowHiFlowRange
1660	Team A	2015-09-29	NA	NA	NA	NonDetect
2654	Team A	2015-09-29	PipingOrGasLine	Other	0.0917783	None
2654	Team A	2015-09-29	Separator	PneumaticController	0.00815808	BelowHiFlowRange
656	Team A	2015-09-30	WellHead	Other	0.0999364	None
656	Team A	2015-09-30	WellHead	PressureGauge	0.0265137	BelowHiFlowRange
656	Team A	2015-09-30	WellHead	PressureGauge	0.0183557	BelowHiFlowRange
701	Team A	2015-09-30	Tank	Tank	1.08502	None
701	Team A	2015-09-30	Separator	PneumaticDevice	0.236584	None
701	Team A	2015-09-30	Separator	PneumaticDevice	0.230466	None
701	Team A	2015-09-30	PipingOrGasLine	Other	0	BelowHiFlowRange
701	Team A	2015-09-30	Separator	Regulator	0	BelowHiFlowRange
965	Team A	2015-09-30	Separator	Valve	0	BelowHiFlowRange
965	Team A	2015-09-30	Separator	Valve	0	BelowHiFlowRange
965	Team A	2015-09-30	Separator	Valve	0	BelowHiFlowRange
965	Team A	2015-09-30	Tank	Tank	0	BelowHiFlowRange
1590	Team A	2015-09-30	Separator	PneumaticDevice	0.173359	None
1590	Team A	2015-09-30	WellHead	PressureGauge	0.165201	None
1590	Team A	2015-09-30	Separator	PneumaticDevice	0.161122	None
1590	Team A	2015-09-30	Separator	PneumaticDevice	0.159082	None
1590	Team A	2015-09-30	Tank	Other	0.142766	None
1590	Team A	2015-09-30	Separator	PneumaticDevice	0.118292	None
1590	Team A	2015-09-30	Separator	PneumaticDevice	0.104015	None
1590	Team A	2015-09-30	Tank	Tank	0.00203952	BelowHiFlowRange
1590	Team A	2015-09-30	Tank	Tank	0	BelowHiFlowRange
570	Team A	2015-10-01	WellHead	Other	0.216189	None
570	Team A	2015-10-01	Separator	Valve	0.0367113	BelowHiFlowRange
686	Team A	2015-10-01	NA	NA	NA	NonDetect
770	Team A	2015-10-01	WellHead	Unknown	0	ObservedNotMeasured
770	Team A	2015-10-01	Tank	Tank	0	BelowHiFlowRange
1603	Team A	2015-10-01	WellHead	Other	0.0346718	BelowHiFlowRange
1603	Team A	2015-10-01	WellHead	Regulator	0.00815808	BelowHiFlowRange
1603	Team A	2015-10-01	Tank	Tank	0	ObservedNotMeasured
1742	Team A	2015-10-01	NA	NA	NA	NonDetect
1856	Team A	2015-10-01	Compressor	LiquidLevelController	0.0122371	BelowHiFlowRange
2109	Team A	2015-10-01	NA	NA	NA	NonDetect
2914	Team A	2015-10-01	Separator	PneumaticDevice	0.00407904	BelowHiFlowRange
957	Team A	2015-10-02	NA	NA	NA	NonDetect
1238	Team A	2015-10-02	Separator	PneumaticDevice	0.16928	None
1543	Team A	2015-10-02	WellHead	ChemicalPump	0.00611856	BelowHiFlowRange
1543	Team A	2015-10-02	Separator	Valve	0.00407904	BelowHiFlowRange
1716	Team A	2015-10-02	NA	NA	NA	NonDetect
2013	Team A	2015-10-02	Separator	PneumaticDevice	0.0203952	BelowHiFlowRange
2663	Team A	2015-10-02	WellHead	Connector	0.0122371	BelowHiFlowRange
2847	Team A	2015-10-02	Compressor	Other	0.108094	None
2847	Team A	2015-10-02	WellHead	PneumaticDevice	0	BelowHiFlowRange
2847	Team A	2015-10-02	Tank	Tank	0	BelowHiFlowRange
503	Team A	2015-10-05	NA	NA	NA	NonDetect
1097	Team A	2015-10-05	Separator	Valve	0.00815808	BelowHiFlowRange
1202	Team A	2015-10-05	Tank	Tank	6.1206	None
1202	Team A	2015-10-05	Tank	Tank	4.50326	None
1202	Team A	2015-10-05	Separator	Other	0.0428299	BelowHiFlowRange
1202	Team A	2015-10-05	Tank	Tank	0	ObservedNotMeasured
1240	Team A	2015-10-05	WellHead	Connector	0.0856598	None
1240	Team A	2015-10-05	Tank	Tank	0.00407904	BelowHiFlowRange
1240	Team A	2015-10-05	Separator	Flange	0	BelowHiFlowRange
1240	Team A	2015-10-05	Separator	Valve	0	BelowHiFlowRange
1240	Team A	2015-10-05	Separator	Valve	0	BelowHiFlowRange
1507	Team A	2015-10-05	Tank	Tank	0.246782	None
1507	Team A	2015-10-05	Separator	Regulator	0.0367113	BelowHiFlowRange
1507	Team A	2015-10-05	WellHead	Other	0.00815808	BelowHiFlowRange
1516	Team A	2015-10-05	WellHead	Connector	0	BelowHiFlowRange
45	Team A	2015-10-06	NA	NA	NA	NonDetect
265	Team A	2015-10-06	Tank	Tank	0	BelowHiFlowRange
1036	Team A	2015-10-06	Tank	Tank	0.146845	None
1036	Team A	2015-10-06	Separator	PneumaticController	0.0652646	None
1036	Team A	2015-10-06	Separator	PneumaticController	0.00407904	BelowHiFlowRange
1036	Team A	2015-10-06	Separator	PneumaticController	0	BelowHiFlowRange
1964	Team A	2015-10-06	Tank	Tank	0.0203952	BelowHiFlowRange
1964	Team A	2015-10-06	WellHead	Other	0.0122371	BelowHiFlowRange
2138	Team A	2015-10-06	NA	NA	NA	NonDetect
63	Team A	2015-10-07	NA	NA	NA	NonDetect
956	Team A	2015-10-07	Separator	PneumaticController	0.0775017	None
956	Team A	2015-10-07	Separator	Valve	0.0265137	BelowHiFlowRange
2106	Team A	2015-10-07	Other	Connector	0.0856598	None
2243	Team A	2015-10-07	Compressor	Other	1.10542	None
2243	Team A	2015-10-07	Separator	PressureController	0.224347	None
2243	Team A	2015-10-07	Separator	PressureController	0.197833	None
2243	Team A	2015-10-07	Separator	PressureController	0.150924	None
2243	Team A	2015-10-07	Separator	PressureController	0.0734227	None
2721	Team A	2015-10-07	NA	NA	NA	NonDetect
2851	Team A	2015-10-07	Other	Connector	0.0122371	BelowHiFlowRange
2851	Team A	2015-10-07	WellHead	Connector	0.0122371	BelowHiFlowRange
2913	Team A	2015-10-07	WellHead	PressureController	0.226387	None
2913	Team A	2015-10-07	Tank	Tank	0.0530275	BelowHiFlowRange
2913	Team A	2015-10-07	WellHead	Valve	0.0163162	BelowHiFlowRange
2940	Team A	2015-10-07	NA	NA	NA	NonDetect
2966	Team A	2015-10-07	Compressor	Other	0.0978969	None
2966	Team A	2015-10-07	Other	Other	0.0489485	BelowHiFlowRange
371	Team A	2015-10-08	Tank	Unknown	0	ObservedNotMeasured
614	Team A	2015-10-08	Tank	Unknown	0.134608	None
614	Team A	2015-10-08	Separator	PneumaticController	0.0285533	BelowHiFlowRange
614	Team A	2015-10-08	Separator	PneumaticController	0.0142766	BelowHiFlowRange
1177	Team A	2015-10-08	Tank	Unknown	0	ObservedNotMeasured
1893	Team A	2015-10-08	Compressor	Other	0.00815808	BelowHiFlowRange
1893	Team A	2015-10-08	WellHead	Other	0.00407904	BelowHiFlowRange
1893	Team A	2015-10-08	Tank	Unknown	0	BelowHiFlowRange
2527	Team A	2015-10-08	Separator	Regulator	0.0122371	BelowHiFlowRange
2527	Team A	2015-10-08	Tank	Unknown	0	BelowHiFlowRange
2638	Team A	2015-10-08	Tank	Unknown	0.0917783	None
2638	Team A	2015-10-08	Separator	PneumaticController	0.059146	None
2638	Team A	2015-10-08	Separator	PneumaticController	0.0101976	BelowHiFlowRange
2638	Team A	2015-10-08	Separator	PneumaticController	0	BelowHiFlowRange
2863	Team A	2015-10-08	NA	NA	NA	NonDetect
2951	Team A	2015-10-08	Tank	Tank	8.83927	IncompleteCapture
2951	Team A	2015-10-08	Compressor	Regulator	0.101976	None
2951	Team A	2015-10-08	Compressor	Other	0	ObservedNotMeasured
3038	Team A	2015-10-08	Tank	Tank	0.0183557	BelowHiFlowRange
3038	Team A	2015-10-08	WellHead	Other	0	BelowHiFlowRange
151	Team A	2015-10-09	Separator	PneumaticController	0.0203952	BelowHiFlowRange
178	Team A	2015-10-09	Tank	Tank	0.0122371	BelowHiFlowRange
576	Team A	2015-10-09	Tank	Other	0.0163162	BelowHiFlowRange
576	Team A	2015-10-09	Tank	Other	0.00815808	BelowHiFlowRange
576	Team A	2015-10-09	WellHead	Other	0.00815808	BelowHiFlowRange
576	Team A	2015-10-09	WellHead	Connector	0.00815808	BelowHiFlowRange
576	Team A	2015-10-09	Tank	Other	0.00407904	BelowHiFlowRange
1508	Team A	2015-10-09	Separator	Valve	0.0244742	BelowHiFlowRange
1508	Team A	2015-10-09	Separator	Connector	0.0163162	BelowHiFlowRange
1524	Team A	2015-10-09	NA	NA	NA	NonDetect
1998	Team A	2015-10-09	Tank	Other	0.00815808	BelowHiFlowRange
2006	Team A	2015-10-09	NA	NA	NA	NonDetect
129	Team A	2015-10-12	NA	NA	NA	NonDetect
360	Team A	2015-10-12	Separator	PneumaticController	0.00815808	BelowHiFlowRange
513	Team A	2015-10-12	Tank	Tank	0.218229	None
513	Team A	2015-10-12	Compressor	LiquidLevelController	0.120332	None
513	Team A	2015-10-12	WellHead	Connector	0.0673041	None
661	Team A	2015-10-12	Separator	Union	0.00815808	BelowHiFlowRange
839	Team A	2015-10-12	Tank	Tank	0	ObservedNotMeasured
839	Team A	2015-10-12	Tank	Tank	0	ObservedNotMeasured
1274	Team A	2015-10-12	Tank	Tank	0.00407904	BelowHiFlowRange
1502	Team A	2015-10-12	PipingOrGasLine	Other	0.134608	None
1502	Team A	2015-10-12	Separator	Connector	0.0183557	BelowHiFlowRange
1502	Team A	2015-10-12	WellHead	Other	0.00815808	BelowHiFlowRange
1502	Team A	2015-10-12	WellHead	Other	0.00815808	BelowHiFlowRange
1502	Team A	2015-10-12	Tank	Tank	0	BelowHiFlowRange
1502	Team A	2015-10-12	Tank	Tank	0	BelowHiFlowRange
1502	Team A	2015-10-12	Tank	Tank	0	BelowHiFlowRange
1502	Team A	2015-10-12	WellHead	Connector	0	BelowHiFlowRange
1559	Team A	2015-10-12	Compressor	LiquidLevelController	0.617974	None
1559	Team A	2015-10-12	Tank	Tank	0.228426	None
1559	Team A	2015-10-12	Separator	Connector	0.0163162	BelowHiFlowRange
1559	Team A	2015-10-12	Separator	Connector	0.0142766	BelowHiFlowRange
1652	Team A	2015-10-12	Compressor	Other	1.47253	None
1652	Team A	2015-10-12	Compressor	Other	0.742385	None
1652	Team A	2015-10-12	Compressor	PneumaticController	0.120332	None
1652	Team A	2015-10-12	Compressor	RodPackingVent	0.0734227	None
1652	Team A	2015-10-12	Compressor	PneumaticController	0.0305928	BelowHiFlowRange
1652	Team A	2015-10-12	Separator	Regulator	0.0142766	BelowHiFlowRange
1652	Team A	2015-10-12	Tank	Tank	0.0101976	BelowHiFlowRange
1978	Team A	2015-10-12	WellHead	Valve	0.132569	None
1978	Team A	2015-10-12	Separator	Connector	0	BelowHiFlowRange
2301	Team A	2015-10-12	Compressor	LiquidLevelController	0.801531	None
2301	Team A	2015-10-12	Compressor	LiquidLevelController	0.746464	None
2301	Team A	2015-10-12	Tank	Tank	0.124411	None
2514	Team A	2015-10-12	Separator	PneumaticController	0.0693436	None
2788	Team A	2015-10-12	Tank	Tank	0.050988	BelowHiFlowRange
3033	Team A	2015-10-12	WellHead	Regulator	0.00611856	BelowHiFlowRange
3033	Team A	2015-10-12	Separator	Regulator	0	BelowHiFlowRange
274	Team A	2015-10-13	Compressor	Other	0.244742	None
274	Team A	2015-10-13	Compressor	PneumaticController	0.0142766	BelowHiFlowRange
274	Team A	2015-10-13	Separator	PRV	0	BelowHiFlowRange
274	Team A	2015-10-13	Compressor	Other	0	ObservedNotMeasured
442	Team A	2015-10-13	Compressor	Connector	1.35424	None
442	Team A	2015-10-13	Tank	Tank	0.987127	IncompleteCapture
442	Team A	2015-10-13	Compressor	Unknown	0.183557	None
442	Team A	2015-10-13	Tank	Tank	0.0101976	BelowHiFlowRange
442	Team A	2015-10-13	Tank	Tank	0	BelowHiFlowRange
843	Team A	2015-10-13	NA	NA	NA	NonDetect
958	Team A	2015-10-13	Tank	Tank	0.17132	None
958	Team A	2015-10-13	Separator	Other	0.00611856	BelowHiFlowRange
958	Team A	2015-10-13	Separator	Connector	0.00407904	BelowHiFlowRange
958	Team A	2015-10-13	Tank	Tank	0	BelowHiFlowRange
1079	Team A	2015-10-13	Compressor	Other	0.236584	None
1493	Team A	2015-10-13	NA	NA	NA	NonDetect
1493	Team A	2015-10-13	Compressor	Other	0.0224347	BelowHiFlowRange
1669	Team A	2015-10-13	Compressor	Regulator	3.3183	None
1669	Team A	2015-10-13	Tank	Tank	0.556789	None
1691	Team A	2015-10-13	Tank	Tank	0.0407904	BelowHiFlowRange
1925	Team A	2015-10-13	NA	NA	NA	NonDetect
2099	Team A	2015-10-13	Tank	Tank	0.0346718	BelowHiFlowRange
2399	Team A	2015-10-13	NA	NA	NA	NonDetect
2402	Team A	2015-10-13	NA	NA	NA	NonDetect
2861	Team A	2015-10-13	NA	NA	NA	NonDetect
267	Team A	2015-10-14	NA	NA	NA	NonDetect
561	Team A	2015-10-14	WellHead	Other	0.197833	None
1144	Team A	2015-10-14	Separator	Connector	0.193754	None
1144	Team A	2015-10-14	Separator	Other	0.187636	None
1144	Team A	2015-10-14	Separator	Other	0.179478	None
1144	Team A	2015-10-14	Separator	Other	0.175399	None
2087	Team A	2015-10-14	WellHead	Other	0.0693436	None
2394	Team A	2015-10-14	WellHead	Other	0.0265137	BelowHiFlowRange
2477	Team A	2015-10-14	WellHead	Other	0.195794	None
2616	Team A	2015-10-14	NA	NA	NA	NonDetect
2720	Team A	2015-10-14	WellHead	Other	0.120332	None
2720	Team A	2015-10-14	Separator	Other	0.0142766	BelowHiFlowRange
2977	Team A	2015-10-14	Tank	Tank	0.263098	None
2977	Team A	2015-10-14	Separator	PressureController	0.173359	None
2977	Team A	2015-10-14	Separator	PressureController	0.0958574	None
2977	Team A	2015-10-14	Separator	Valve	0.0815808	None
2977	Team A	2015-10-14	Unknown	PressureController	0.0346718	BelowHiFlowRange
3004	Team A	2015-10-14	Separator	PneumaticController	0.0305928	BelowHiFlowRange
91	Team A	2015-10-15	NA	NA	NA	NonDetect
139	Team A	2015-10-15	Separator	PneumaticController	0.16928	None
139	Team A	2015-10-15	Tank	Tank	0.0999364	None
139	Team A	2015-10-15	Separator	Regulator	0.0203952	BelowHiFlowRange
653	Team A	2015-10-15	WellHead	ChemicalPump	0	ObservedNotMeasured
1150	Team A	2015-10-15	WellHead	Other	0	BelowHiFlowRange
1150	Team A	2015-10-15	Separator	Regulator	0	BelowHiFlowRange
1166	Team A	2015-10-15	PipingOrGasLine	Tank	3.8812	None
1166	Team A	2015-10-15	Compressor	LiquidLevelController	0.807649	None
1166	Team A	2015-10-15	Separator	PneumaticController	0.352837	None
1166	Team A	2015-10-15	Separator	PneumaticController	0.238624	None
1166	Team A	2015-10-15	Separator	PneumaticController	0.0265137	BelowHiFlowRange
1166	Team A	2015-10-15	WellHead	Other	0	BelowHiFlowRange
1667	Team A	2015-10-15	WellHead	Tank	0	BelowHiFlowRange
2406	Team A	2015-10-15	NA	NA	NA	NonDetect
2446	Team A	2015-10-15	Tank	Tank	5.30071	IncompleteCapture
2446	Team A	2015-10-15	Tank	Tank	1.47457	None
2446	Team A	2015-10-15	Compressor	LiquidLevelController	0.124411	None
2446	Team A	2015-10-15	WellHead	Other	0.0652646	None
2446	Team A	2015-10-15	Separator	Valve	0.0448694	BelowHiFlowRange
582	Team A	2015-10-16	Compressor	Other	0.354876	None
582	Team A	2015-10-16	Separator	PneumaticController	0.114213	None
582	Team A	2015-10-16	Tank	Tank	0.0326323	BelowHiFlowRange
582	Team A	2015-10-16	Tank	Tank	0.0142766	BelowHiFlowRange
676	Team A	2015-10-16	Compressor	LiquidLevelController	1.07483	None
676	Team A	2015-10-16	Compressor	LiquidLevelController	0.363034	None
676	Team A	2015-10-16	Tank	Tank	0.152964	None
676	Team A	2015-10-16	Separator	PneumaticController	0.0244742	BelowHiFlowRange
1487	Team A	2015-10-16	Tank	Tank	0	ObservedNotMeasured
1487	Team A	2015-10-16	Other	ChemicalPump	0	ObservedNotMeasured
2171	Team A	2015-10-16	Compressor	PneumaticController	0.130529	None
2171	Team A	2015-10-16	Compressor	RodPackingVent	0.0713832	None
2171	Team A	2015-10-16	Tank	Tank	0.0407904	BelowHiFlowRange
37	Team B	2015-09-28	NA	NA	NA	NonDetect
198	Team B	2015-09-28	NA	NA	NA	NonDetect
209	Team B	2015-09-28	WellHead	PRV	0.0462022	BelowHiFlowRange
312	Team B	2015-09-28	NA	NA	NA	NonDetect
435	Team B	2015-09-28	NA	NA	NA	NonDetect
450	Team B	2015-09-28	NA	NA	NA	NonDetect
466	Team B	2015-09-28	PipingOrGasLine	Flange	0.231011	None
593	Team B	2015-09-28	NA	NA	NA	NonDetect
597	Team B	2015-09-28	Separator	LiquidLevelController	0.0231011	BelowHiFlowRange
790	Team B	2015-09-28	NA	NA	NA	NonDetect
798	Team B	2015-09-28	Unknown	Regulator	0.0231011	BelowHiFlowRange
926	Team B	2015-09-28	NA	NA	NA	NonDetect
976	Team B	2015-09-28	NA	NA	NA	NonDetect
1234	Team B	2015-09-28	NA	NA	NA	NonDetect
2116	Team B	2015-09-28	NA	NA	NA	NonDetect
2244	Team B	2015-09-28	NA	NA	NA	NonDetect
2802	Team B	2015-09-28	NA	NA	NA	NonDetect
2850	Team B	2015-09-28	NA	NA	NA	NonDetect
2890	Team B	2015-09-28	NA	NA	NA	NonDetect
2922	Team B	2015-09-28	Compressor	LiquidLevelController	0.473572	None
2922	Team B	2015-09-28	Separator	LiquidLevelController	0.103955	None
2922	Team B	2015-09-28	Compressor	LiquidLevelController	0.103955	None
73	Team B	2015-09-29	WellHead	Unknown	0.0115505	BelowHiFlowRange
73	Team B	2015-09-29	Tank	Unknown	0	ObservedNotMeasured
655	Team B	2015-09-29	Separator	Regulator	0.300314	None
655	Team B	2015-09-29	Compressor	Unknown	0.196359	None
843	Team B	2015-09-29	NA	NA	NA	NonDetect
881	Team B	2015-09-29	NA	NA	NA	NonDetect
1079	Team B	2015-09-29	NA	NA	NA	NonDetect
1085	Team B	2015-09-29	NA	NA	NA	NonDetect
1493	Team B	2015-09-29	Compressor	PRV	0.0231011	BelowHiFlowRange
1493	Team B	2015-09-29	Compressor	LiquidLevelController	0.0231011	BelowHiFlowRange
1493	Team B	2015-09-29	Separator	Regulator	0.0115505	BelowHiFlowRange
1691	Team B	2015-09-29	Tank	DumpValve	0	ObservedNotMeasured
1925	Team B	2015-09-29	NA	NA	NA	NonDetect
2018	Team B	2015-09-29	NA	NA	NA	NonDetect
2099	Team B	2015-09-29	WellHead	Other	0.0115505	BelowHiFlowRange
2399	Team B	2015-09-29	NA	NA	NA	NonDetect
2402	Team B	2015-09-29	NA	NA	NA	NonDetect
2898	Team B	2015-09-29	Separator	Flange	0.0346516	BelowHiFlowRange
3002	Team B	2015-09-29	WellHead	Unknown	0.0115505	BelowHiFlowRange
3002	Team B	2015-09-29	Tank	DumpValve	0	ObservedNotMeasured
263	Team B	2015-09-30	NA	NA	NA	NonDetect
316	Team B	2015-09-30	NA	NA	NA	NonDetect
630	Team B	2015-09-30	NA	NA	NA	NonDetect
638	Team B	2015-09-30	NA	NA	NA	NonDetect
825	Team B	2015-09-30	WellHead	PRV	0.0231011	BelowHiFlowRange
825	Team B	2015-09-30	WellHead	PRV	0.0231011	BelowHiFlowRange
964	Team B	2015-09-30	NA	NA	NA	NonDetect
1716	Team B	2015-09-30	NA	NA	NA	NonDetect
1808	Team B	2015-09-30	NA	NA	NA	NonDetect
1912	Team B	2015-09-30	NA	NA	NA	NonDetect
1960	Team B	2015-09-30	Separator	Regulator	0.127056	None
2004	Team B	2015-09-30	WellHead	Connector	0.0693033	None
2665	Team B	2015-09-30	Separator	Connector	0.0115505	BelowHiFlowRange
68	Team B	2015-10-01	NA	NA	NA	NonDetect
286	Team B	2015-10-01	Tank	Unknown	0	ObservedNotMeasured
516	Team B	2015-10-01	WellHead	PRV	0.0115505	BelowHiFlowRange
574	Team B	2015-10-01	NA	NA	NA	NonDetect
714	Team B	2015-10-01	NA	NA	NA	NonDetect
765	Team B	2015-10-01	NA	NA	NA	NonDetect
770	Team B	2015-10-01	NA	NA	NA	NonDetect
1357	Team B	2015-10-01	NA	NA	NA	NonDetect
1374	Team B	2015-10-01	Separator	LiquidLevelController	0.0462022	BelowHiFlowRange
1374	Team B	2015-10-01	Separator	LiquidLevelController	0.0462022	BelowHiFlowRange
1566	Team B	2015-10-01	NA	NA	NA	NonDetect
1589	Team B	2015-10-01	NA	NA	NA	NonDetect
1742	Team B	2015-10-01	NA	NA	NA	NonDetect
1798	Team B	2015-10-01	Compressor	ChemicalPump	0.0115505	BelowHiFlowRange
1917	Team B	2015-10-01	NA	NA	NA	NonDetect
1931	Team B	2015-10-01	Separator	LiquidLevelController	0.0115505	BelowHiFlowRange
2186	Team B	2015-10-01	NA	NA	NA	NonDetect
2282	Team B	2015-10-01	Separator	Unknown	0.0924044	None
2282	Team B	2015-10-01	WellHead	Other	0.0115505	BelowHiFlowRange
2443	Team B	2015-10-01	NA	NA	NA	NonDetect
2579	Team B	2015-10-01	NA	NA	NA	NonDetect
2772	Team B	2015-10-01	NA	NA	NA	NonDetect
2836	Team B	2015-10-01	Separator	LiquidLevelController	0.20791	None
2914	Team B	2015-10-01	NA	NA	NA	NonDetect
839	Team B	2015-10-02	NA	NA	NA	NonDetect
1172	Team B	2015-10-02	Tank	Unknown	0	ObservedNotMeasured
1238	Team B	2015-10-02	Separator	LiquidLevelController	0.0346516	BelowHiFlowRange
1405	Team B	2015-10-02	NA	NA	NA	NonDetect
1836	Team B	2015-10-02	NA	NA	NA	NonDetect
1947	Team B	2015-10-02	NA	NA	NA	NonDetect
2013	Team B	2015-10-02	NA	NA	NA	NonDetect
2205	Team B	2015-10-02	NA	NA	NA	NonDetect
2452	Team B	2015-10-02	NA	NA	NA	NonDetect
2663	Team B	2015-10-02	NA	NA	NA	NonDetect
2746	Team B	2015-10-02	NA	NA	NA	NonDetect
40	Team B	2015-10-05	Compressor	Unknown	0.103955	None
117	Team B	2015-10-05	NA	NA	NA	NonDetect
324	Team B	2015-10-05	NA	NA	NA	NonDetect
501	Team B	2015-10-05	Separator	Unknown	0	BelowHiFlowRange
503	Team B	2015-10-05	NA	NA	NA	NonDetect
589	Team B	2015-10-05	NA	NA	NA	NonDetect
602	Team B	2015-10-05	NA	NA	NA	NonDetect
673	Team B	2015-10-05	NA	NA	NA	NonDetect
729	Team B	2015-10-05	NA	NA	NA	NonDetect
806	Team B	2015-10-05	NA	NA	NA	NonDetect
815	Team B	2015-10-05	Compressor	PRV	0.0924044	None
1034	Team B	2015-10-05	NA	NA	NA	NonDetect
1097	Team B	2015-10-05	Separator	Unknown	0	BelowHiFlowRange
1202	Team B	2015-10-05	Tank	Unknown	0	ObservedNotMeasured
1310	Team B	2015-10-05	Compressor	Regulator	0.173258	None
1310	Team B	2015-10-05	Compressor	PressureGauge	0.161708	None
1368	Team B	2015-10-05	NA	NA	NA	NonDetect
1507	Team B	2015-10-05	Separator	Regulator	0.0231011	BelowHiFlowRange
1516	Team B	2015-10-05	NA	NA	NA	NonDetect
1719	Team B	2015-10-05	NA	NA	NA	NonDetect
2590	Team B	2015-10-05	NA	NA	NA	NonDetect
2599	Team B	2015-10-05	PipingOrGasLine	Unknown	0.115505	None
2948	Team B	2015-10-05	NA	NA	NA	NonDetect
2952	Team B	2015-10-05	WellHead	Other	0	BelowHiFlowRange
45	Team B	2015-10-06	NA	NA	NA	NonDetect
188	Team B	2015-10-06	Separator	LiquidLevelController	0.0231011	BelowHiFlowRange
628	Team B	2015-10-06	NA	NA	NA	NonDetect
802	Team B	2015-10-06	Separator	Unknown	0.0693033	None
802	Team B	2015-10-06	Separator	LiquidLevelController	0.0231011	BelowHiFlowRange
1255	Team B	2015-10-06	NA	NA	NA	NonDetect
1533	Team B	2015-10-06	NA	NA	NA	NonDetect
1534	Team B	2015-10-06	NA	NA	NA	NonDetect
1744	Team B	2015-10-06	WellHead	ChemicalPump	0	ObservedNotMeasured
1964	Team B	2015-10-06	WellHead	Unknown	0.0115505	BelowHiFlowRange
2031	Team B	2015-10-06	Separator	Unknown	0.0693033	None
2031	Team B	2015-10-06	Separator	LiquidLevelController	0.0115505	BelowHiFlowRange
2083	Team B	2015-10-06	NA	NA	NA	NonDetect
2138	Team B	2015-10-06	NA	NA	NA	NonDetect
2148	Team B	2015-10-06	Tank	Unknown	0	ObservedNotMeasured
2277	Team B	2015-10-06	NA	NA	NA	NonDetect
2779	Team B	2015-10-06	NA	NA	NA	NonDetect
2810	Team B	2015-10-06	NA	NA	NA	NonDetect
2829	Team B	2015-10-06	NA	NA	NA	NonDetect
2945	Team B	2015-10-06	NA	NA	NA	NonDetect
91	Team B	2015-10-08	NA	NA	NA	NonDetect
775	Team B	2015-10-08	NA	NA	NA	NonDetect
876	Team B	2015-10-08	Compressor	PRV	0.496674	None
876	Team B	2015-10-08	Compressor	LiquidLevelController	0.0577527	None
1166	Team B	2015-10-08	Separator	LiquidLevelController	0	BelowHiFlowRange
1166	Team B	2015-10-08	Separator	LiquidLevelController	0	BelowHiFlowRange
1166	Team B	2015-10-08	Separator	LiquidLevelController	0	BelowHiFlowRange
1166	Team B	2015-10-08	Tank	Unknown	0	ObservedNotMeasured
1177	Team B	2015-10-08	NA	NA	NA	NonDetect
1448	Team B	2015-10-08	NA	NA	NA	NonDetect
1667	Team B	2015-10-08	NA	NA	NA	NonDetect
1866	Team B	2015-10-08	NA	NA	NA	NonDetect
1893	Team B	2015-10-08	NA	NA	NA	NonDetect
127	Team B	2015-10-09	NA	NA	NA	NonDetect
140	Team B	2015-10-09	Separator	Regulator	0.0577527	None
151	Team B	2015-10-09	WellHead	ChemicalPump	0.0115505	BelowHiFlowRange
154	Team B	2015-10-09	NA	NA	NA	NonDetect
178	Team B	2015-10-09	NA	NA	NA	NonDetect
268	Team B	2015-10-09	NA	NA	NA	NonDetect
617	Team B	2015-10-09	NA	NA	NA	NonDetect
700	Team B	2015-10-09	WellHead	Unknown	0.0115505	BelowHiFlowRange
1303	Team B	2015-10-09	NA	NA	NA	NonDetect
1561	Team B	2015-10-09	NA	NA	NA	NonDetect
1651	Team B	2015-10-09	NA	NA	NA	NonDetect
2528	Team B	2015-10-09	NA	NA	NA	NonDetect
2935	Team B	2015-10-09	WellHead	Unknown	0.323415	None
3030	Team B	2015-10-09	NA	NA	NA	NonDetect
360	Team B	2015-10-12	NA	NA	NA	NonDetect
508	Team B	2015-10-12	NA	NA	NA	NonDetect
513	Team B	2015-10-12	WellHead	Unknown	0.0462022	BelowHiFlowRange
513	Team B	2015-10-12	PipingOrGasLine	Flange	0.0462022	BelowHiFlowRange
513	Team B	2015-10-12	Compressor	LiquidLevelController	0.0346516	BelowHiFlowRange
513	Team B	2015-10-12	WellHead	Unknown	0.0346516	BelowHiFlowRange
513	Team B	2015-10-12	PipingOrGasLine	Unknown	0.0346516	BelowHiFlowRange
513	Team B	2015-10-12	Separator	Connector	0	BelowHiFlowRange
882	Team B	2015-10-12	NA	NA	NA	NonDetect
1198	Team B	2015-10-12	NA	NA	NA	NonDetect
1409	Team B	2015-10-12	NA	NA	NA	NonDetect
1631	Team B	2015-10-12	NA	NA	NA	NonDetect
1652	Team B	2015-10-12	Compressor	PRV	0.0346516	BelowHiFlowRange
1652	Team B	2015-10-12	Compressor	LiquidLevelController	0.0346516	BelowHiFlowRange
1652	Team B	2015-10-12	Compressor	PRV	0.0231011	BelowHiFlowRange
1652	Team B	2015-10-12	Separator	Regulator	0.0231011	BelowHiFlowRange
1978	Team B	2015-10-12	WellHead	Unknown	0.0577527	None
2072	Team B	2015-10-12	NA	NA	NA	NonDetect
2923	Team B	2015-10-12	Separator	Regulator	0.288764	None
787	Team B	2015-10-13	Compressor	PRV	0	BelowHiFlowRange
787	Team B	2015-10-13	Separator	OEL	0	BelowHiFlowRange
792	Team B	2015-10-13	NA	NA	NA	NonDetect
794	Team B	2015-10-13	Separator	Unknown	0	BelowHiFlowRange
794	Team B	2015-10-13	Separator	Unknown	0	BelowHiFlowRange
794	Team B	2015-10-13	Separator	Unknown	0	BelowHiFlowRange
794	Team B	2015-10-13	Separator	Unknown	0	BelowHiFlowRange
844	Team B	2015-10-13	Separator	Connector	0.0462022	BelowHiFlowRange
921	Team B	2015-10-13	NA	NA	NA	NonDetect
1212	Team B	2015-10-13	NA	NA	NA	NonDetect
1259	Team B	2015-10-13	NA	NA	NA	NonDetect
1560	Team B	2015-10-13	NA	NA	NA	NonDetect
1669	Team B	2015-10-13	NA	NA	NA	NonDetect
1816	Team B	2015-10-13	Tank	Unknown	0	ObservedNotMeasured
1922	Team B	2015-10-13	NA	NA	NA	NonDetect
2192	Team B	2015-10-13	NA	NA	NA	NonDetect
2207	Team B	2015-10-13	NA	NA	NA	NonDetect
2283	Team B	2015-10-13	NA	NA	NA	NonDetect
2425	Team B	2015-10-13	NA	NA	NA	NonDetect
2687	Team B	2015-10-13	NA	NA	NA	NonDetect
2785	Team B	2015-10-13	Compressor	Regulator	0	BelowHiFlowRange
2790	Team B	2015-10-13	NA	NA	NA	NonDetect
2859	Team B	2015-10-13	NA	NA	NA	NonDetect
3015	Team B	2015-10-13	NA	NA	NA	NonDetect
567	Team B	2015-10-14	NA	NA	NA	NonDetect
3038	Team B	2015-10-14	NA	NA	NA	NonDetect
139	Team B	2015-10-15	Separator	LiquidLevelController	0.231011	None
139	Team B	2015-10-15	Separator	LiquidLevelController	0.115505	None
390	Team B	2015-10-15	Compressor	PRV	0.508224	None
390	Team B	2015-10-15	Compressor	PRV	0.127056	None
390	Team B	2015-10-15	Separator	PRV	0.0231011	BelowHiFlowRange
932	Team B	2015-10-15	NA	NA	NA	NonDetect
1148	Team B	2015-10-15	Tank	Unknown	0	ObservedNotMeasured
1360	Team B	2015-10-15	Separator	LiquidLevelController	0.0115505	BelowHiFlowRange
1360	Team B	2015-10-15	Separator	LiquidLevelController	0.0115505	BelowHiFlowRange
1615	Team B	2015-10-15	WellHead	Other	0.0808538	None
1653	Team B	2015-10-15	Separator	LiquidLevelController	0.161708	None
1653	Team B	2015-10-15	Separator	LiquidLevelController	0.0115505	BelowHiFlowRange
1653	Team B	2015-10-15	Separator	LiquidLevelController	0.0115505	BelowHiFlowRange
1653	Team B	2015-10-15	Separator	LiquidLevelController	0.0115505	BelowHiFlowRange
1653	Team B	2015-10-15	WellHead	Unknown	0.0115505	BelowHiFlowRange
1844	Team B	2015-10-15	NA	NA	NA	NonDetect
2406	Team B	2015-10-15	NA	NA	NA	NonDetect
2594	Team B	2015-10-15	Separator	Unknown	0.0115505	BelowHiFlowRange
582	Team B	2015-10-16	Separator	LiquidLevelController	0.150157	None
752	Team B	2015-10-16	NA	NA	NA	NonDetect
2583	Team B	2015-10-16	Compressor	PRV	0.0462022	BelowHiFlowRange
2583	Team B	2015-10-16	Compressor	LiquidLevelController	0.0231011	BelowHiFlowRange

## Sheet: OTM33aMeasurements
Facility ID	Measurement Date	CH4 Emission Estimate kgPerHour	Lower Confidence Limit kgPerHour	Upper Confidence Limit kgPerHour	Flag
2109	2015-10-01	0.0174866	0.00944278	0.037946
833	2015-09-30	0.0471044	0.0254364	0.102217
570	2015-10-01	0.288369	0.155719	0.625761
1054	2015-10-01	1.12798	0.609107	2.44771
1054	2015-10-01	3.03647	1.63969	6.58914
701	2015-09-30	1.55313	0.838691	3.3703
701	2015-09-30	0.784127	0.423428	1.70155
1925	2015-10-13	0	0	0	0BOT
2861	2015-10-13	0	0	0	0BOT
274	2015-10-13	2.84405	1.53579	6.17159
1079	2015-10-13	3.21808	1.73776	6.98323
2399	2015-10-13	0	0	0	0BOT
1334	2015-10-13	0	0	0	0BOT
614	2015-10-08	0.102263	0.055222	0.221911
926	2015-09-29	0.211594	0.114261	0.459158
927	2015-09-29	0.132335	0.0714609	0.287167
1234	2015-09-28	0.244547	0.132055	0.530667
37	2015-09-28	0	0	0	0BOT
2244	2015-09-28	0.0350003	0.0189002	0.0759506
371	2015-10-08	9.06601	4.89565	19.6732	Manual Unloading
371	2015-10-08	62.5805	33.7935	135.8	Manual Unloading
2851	2015-10-07	0.0045615	0.00246321	0.00989845
2106	2015-10-07	0.0300381	0.0162206	0.0651828
1166	2015-10-15	1.53278	0.827699	3.32612
2114	2015-10-15	0.517888	0.27966	1.12382
1206	2015-10-07	0.30285	0.163539	0.657185
2243	2015-10-07	0.269673	0.145624	0.585191
2442	2015-10-16	0.152135	0.0821527	0.330132
1487	2015-10-16	0.271556	0.14664	0.589277
582	2015-10-16	1.25058	0.675312	2.71375
1998	2015-10-09	0	0	0	0BOT
1508	2015-10-09	0.0322466	0.0174131	0.0699751
2006	2015-10-09	0.0354995	0.0191697	0.077034
2171	2015-10-16	1.1079	0.598267	2.40415
576	2015-10-09	0.620756	0.335208	1.34704
815	2015-10-05	1.46238	0.789686	3.17337
2599	2015-10-05	15.13	8.17022	32.8322
2599	2015-10-06	5.81219	3.13858	12.6125
2616	2015-10-14	0	0	0	0BOT
2779	2015-10-05	0.0922414	0.0498104	0.200164
503	2015-10-05	0	0	0	0BOT
1202	2015-10-05	26.2852	14.194	57.0389
1202	2015-10-05	2.26544	1.22334	4.916
1516	2015-10-05	0	0	0	0BOT
45	2015-10-06	0	0	0	0BOT
2367	2015-10-06	0	0	0	0BOT
1036	2015-10-06	0.0852805	0.0460515	0.185059
1964	2015-10-06	0.0374214	0.0202076	0.0812045
2013	2015-10-02	0.0136	0.0074	0.0296
2072	2015-10-02	0.010144	0.00547776	0.0220125
1405	2015-10-02	0	0	0	0BOT
1652	2015-10-12	2.25058	1.21531	4.88375
513	2015-10-02	1.18327	0.638967	2.5677
1172	2015-10-02	0.531958	0.287257	1.15435
2977	2015-10-14	0.302535	0.163369	0.656501

## Sheet: TracerMeasurements
Facility ID	Measurement Date	CH4 Emission Estimate kgPerHour	Lower Confidence Limit kgPerHour	Upper Confidence Limit kgPerHour	Flag
770	2015-10-01	0.649108	0	1.52514
833	2015-09-30	0.0401036	0	0.086632
570	2015-10-01	0.886195	0.38977	1.38262
656	2015-09-30	0.483186	0	1.10265
701	2015-09-30	1.6301	1.18906	2.07114
2527	2015-10-08	0	0	2.71345	LOD
371	2015-10-08	810.399	603.151	1017.65	Manual Unloading
2913	2015-10-07	0.257095	0.152511	0.361678
956	2015-10-07	0.887786	0.443925	1.33165
2966	2015-10-07	1.32307	0.0417058	2.60444
2243	2015-10-07	2.88994	2.08457	3.69532
2599	2015-10-06	8.27687	5.06035	11.4934
1964	2015-10-06	0.391001	0.216794	0.565207
1543	2015-10-02	0	0	11.7442	LOD
2013	2015-10-02	0	0	0.74274	LOD
957	2015-10-02	1.32811	0.426604	2.22962
1172	2015-10-02	1.53131	0	3.27363

## Sheet: Compressor - Activity Data
Facility ID	Rated Power [hp]	Annual Op Time [hr]	Heat Rate [BTU/hp-hr]
1603	84	8450	7914
2579	46	8760	10777
1856	84	8720	7914
1798	145	8613.5	8375
2836	118	7469.5	8032
1589	95	7240	7842
656	95	0	7875
2687	50	8690	7200
2402	46	8714.5	10777
2785	55	7453.5	8038
1691	75	672	8750
655	55	8740	8038
274	50	8760	7200
1079	95	8760	7842
2207	46	8756	10777
787	46	8525	10777
2898	80	8497.25	7543
2527	80	5831	11200
1148	99	8059	8711
1148	50	480	8200
390	50	8760	7200
390	50	8751	7200
466	46	8748	10777
1360	46	8743	10777
1360	75	8753	10500
2922	80	8612	11200
435	46	383	10777
435	84	8666	7914
2951	55	8750	8038
1893	75	8650	10500
371	75	8696	10500
876	75	8007	10500
876	75	7936	10500
876	75	8608.5	10500
2721	148	0	8000
1166	0	0	0
932	145	8686.25	8375
932	84	8711.5	7914
2966	95	0	7875
2243	95	0	7875
752	46	3992	10777
2528	50	5534	7200
676	0	0	0
2171	80	8709	11200
1484	75	7924	10500
2583	215	8689	7842
684	95	8724	7842
1240	0	0	0
815	0	0	0
2779	0	0	0
503	55	8604.5	8038
806	46	8625	10777
1310	80	8760	11200
1534	95	8358	7842
40	46	8378	10777
1198	46	8755	10777
1652	0	0	0
1652	0	0	0
360	0	0	0
2514	50	881	8200
2301	0	0	0
1559	118	8758	8032
2746	50	2631	8200
2788	46	8546	10777
513	0	0	0

## Sheet: Compressor - Stack Data
Methane emissions from exhaust stack tests on CAT3300 series engines. Data provided by study partners
Engine Manufacturer	Engine Model	Rated Horsepower	Average CH4 (as meth) (g/hp-hr)
Caterpillar	G3306 NA	145	0.899882
Caterpillar	G3306 TA	203	0.183776
Caterpillar	G3306 TA	203	0.317512
Caterpillar	G3306 TA	203	0.176753
Caterpillar	G3306 TA	203	0.194802
Caterpillar	G3306 TA	203	0.643303
Caterpillar	G3306 TA	203	0.274388
Caterpillar	G3306 TA	203	0.251303
Caterpillar	G3306 TA	203	0.165125
Caterpillar	G3306 TA	203	0.235406

## Sheet: Plunger LU - Activity Data
		* (vents/day) To improve the degree to which the SOE represents the same time period and facility operating status as the downwind measurements, event counts specific to the day of measurement (as opposed to annual event counts) were provided by the operators for facilities with automated plunger unloadings where onsite measurement was paired with tracer or OTM33A estimates
		** (vents/week) To improve the degree to which the SOE represents the same time period and facility operating status as the downwind measurements, event counts specific to the day of measurement (as opposed to annual event counts) were provided by the operators for facilities with automated plunger unloadings where onsite measurement was paired with tracer or OTM33A estimates
Facility ID	Well #	Annual Count	Average Duration [hr]	Tubing Diameter [in]	Well Depth [ft]	Flow-line pressure [psia]	Average Flowline Rate [SCFH]
574	1	1314	0.220163	1.995	3861	108.381	414.313
765	1	713	0.119506	1.995	4253	88.4813	2563.93
770	5	4**	0.16942	1.995	3505	61.7717	6043.12
1742	1	531	0.0889699	1.995	4007	89.6228	10337.4
516	2	109	1.29996	1.995	3811	88.6954	4946.01
1917	1	460	0.035628	1.995	3920	91.0132	11817.1
1917	2	39	0.133335	1.995	4471	77.2171	13553.9
2282	3	983	0.000395388			79.8729	14458.3
286	2	240	0.01	1.995	4609	93.4252	10661.9
921	1	1314	0.220163	1.995	3814	71.2835	4746.69
792	1	379	0.337105	1.995	3808	56.4847	10487.6
2425	3	35	0.189903	1.995	3969	96.1963	6958.33
655	7	328	0.0556439	1.995	4130	34.9992	8708.33
1079	4	3*	0.0386539	1.995	4086	69.1927	7698.54
2207	1	2311	0.001167	1.995	4127	79.8306	10208.3
2790	1	587	0.0983193	1.995	3781	60.4884	12690.5
1493	2	8	0.002125	1.995	3990	69.2334	14997.9
442	4	3	0.010728	1.995	4045	72.9302	12161.4
2099	7	957	0.113675	1.995	3924	65.2781	13238.9
1922	3	95	0.019535	1.995	3823	70.6438	13412.2
1922	4	1644	0.091676	1.995	3837	73.7521	12340.3
1816	2	128	0.197005	1.995	3994	72.4064	10677.6
1816	5	341	0.010628	1.995	3973	68.5675	14214.9
794	1	221	0.256414	1.995	4274	67.1707	17029.2
2018	3	750	0.086348	1.995	5773	73.2584	10262
2898	1	1099	0.136286	1.995	5721	89.3868	15145.4
73	4	1245	0.208702	1.995	5719	73.6568	14140.9
450	2	723	0.220163	1.995	3963	82.3916	11458.3
2594	4	146	0.0136525	1.995	3670	73.8221	12171.4
312	6	39	0.239937	1.995	3718	72.3636	18484.2
790	2	187	0.0331176	1.995	3607	76.6721	13883.1
1615	2	695	0.244101	1.995	3585	61.3923	16750
1615	3	909	0.241254	1.995	3496	69.4628	12583.3
1615	4	1728	0.175656	1.995	3637	67.291	9041.67
1177	1	2569	0.110009	1.995	4018	193.177	5774.9
1893	3	27	0.163047	1.995	3940	74.4839	11569.9
2599	1	100*	0.0216867	1.995	2438	79.6847	6434.58
673	1	77	0.3007	1.995	3185	95.7506	6768.69
1202	2	25*	0.71099	1.995	3347	99.1858	8331.11
1202	3	25*	0.433022	1.995	3389	104.775	3706.58
729	1	347	0.000163305	1.995	3293	81.439	9862.05
1036	3	2**	0.00156504	1.995	3295	62.3779	9676.74
2829	1	1380	1.78297	1.995	2819	66.0908	2656.33
957	4	1*	0.0333333	1.995	2841	78.2907	3673.56
316	1	2055	0.282774	1.995	2142	81.0928	10981.2
638	2	920	0.306141	1.995	2619.17	67.2733	15238.3

## Sheet: Manual LU - Activity Data
Facility ID	Well #	Date	Duration [hr]	Casing Diameter [in]	Well Depth [ft]	Shut-in Pressure [psia]	Average Flowline Rate [SCFH]
371	1	2015-10-08	8	5.5	3918	128.05	4862.71

## Sheet: Pneumatic - Activity Data
Facility ID	Active Well Count	Low Bleed Count	High Bleed Count	Intermittent Bleed Count	Chemical Injection Pump Count	Total Pneumatics	Pneumatics per Well
574	1	0	0	3	0	4	4
1931	1	0	0	1	0	2	2
1603	1	0	0	0	3	4	4
68	1	0	0	0	0	1	1
2186	1	0	0	0	0	1	1
2109	1	0	0	0	0	1	1
765	1	0	0	3	2	6	6
2772	1	0	0	0	0	1	1
2579	1	0	0	0	2	3	3
770	5	0	0	1	1	7	1.4
1742	2	0	0	0	0	2	1
686	2	0	0	1	1	4	2
2443	3	0	0	0	3	6	2
1566	1	0	0	0	1	2	2
714	1	0	0	0	2	3	3
516	2	0	0	2	3	7	3.5
1856	3	0	0	2	1	6	2
1917	2	0	0	0	0	2	1
1798	1	0	0	0	9	10	10
2282	3	0	0	0	0	3	1
1374	4	0	0	2	0	6	1.5
2836	2	0	0	0	2	4	2
1357	2	0	0	1	0	3	1.5
286	4	0	0	5	1	10	2.5
1589	1	0	0	1	3	5	5
2914	1	0	0	1	0	2	2
570	3	0	0	2	1	6	2
656	3	0	0	10	0	13	4.3
1590	5	0	0	17	0	22	4.4
701	2	0	0	7	0	9	4.5
2192	1	0	0	0	1	2	2
2687	1	0	0	0	1	2	2
1925	1	0	0	0	0	1	1
2283	1	0	0	0	0	1	1
2402	2	0	0	2	0	4	2
921	1	0	0	2	2	5	5
2785	1	0	0	0	2	3	3
2859	1	0	0	0	3	4	4
2861	0	0	0	0	1	1	#N/A
843	2	0	0	0	0	2	1
792	2	0	0	0	1	3	1.5
2425	2	0	0	6	0	8	4
1691	5	0	0	3	0	8	1.6
958	6	0	0	0	0	6	1
655	7	0	0	8	7	22	3.1
274	2	0	0	0	2	4	2
1079	4	0	0	4	2	10	2.5
2207	2	0	0	4	0	6	3
844	7	0	0	5	0	12	1.7
2790	1	0	0	0	0	1	1
1212	1	0	0	0	0	1	1
1493	2	0	0	1	0	3	1.5
442	7	0	0	4	0	11	1.6
2099	7	0	0	0	0	7	1
1922	4	0	0	2	0	6	1.5
1816	8	0	0	9	1	18	2.3
2399	1	0	0	0	3	4	4
794	2	0	0	2	0	4	2
787	5	0	0	5	1	11	2.2
1259	3	0	0	0	0	3	1
3015	3	0	0	3	0	6	2
1560	2	0	0	0	0	2	1
1669	2	0	0	0	0	2	1
2018	3	0	0	4	0	7	2.3
1085	0	0	0	0	5	5	#N/A
965	2	0	0	10	0	12	6
881	1	0	0	2	0	3	3
2898	1	0	0	1	2	4	4
73	4	0	0	4	7	15	3.8
3002	3	0	0	0	1	4	1.3
653	2	0	0	0	1	3	1.5
2527	2	0	0	0	0	2	1
614	2	0	0	0	0	2	1
926	2	0	0	2	0	4	2
927	5	0	0	5	0	10	2
1844	7	0	0	0	0	7	1
1148	6	0	0	0	5	11	1.8
209	6	0	0	5	1	12	2
1234	2	0	0	0	0	2	1
450	4	0	0	4	0	8	2
2594	7	0	0	3	0	10	1.4
390	3	0	0	1	2	6	2
1653	6	0	0	4	0	10	1.7
466	2	0	0	1	0	3	1.5
593	1	0	0	1	0	2	2
312	8	0	0	0	0	8	1
37	2	0	0	0	0	2	1
2244	5	0	0	0	0	5	1
2890	3	0	0	0	0	3	1
1360	3	0	0	2	2	7	2.3
790	4	0	0	0	1	5	1.3
1615	5	0	0	7	0	12	2.4
198	4	0	0	0	0	4	1
2922	4	0	0	3	2	9	2.3
435	6	0	0	4	0	10	1.7
597	3	0	0	1	0	4	1.3
798	3	0	0	0	0	3	1
2850	4	0	0	3	0	7	1.8
976	8	0	0	2	0	10	1.3
567	7	0	0	0	0	7	1
2802	8	0	0	0	2	10	1.3
2116	8	0	0	0	0	8	1
2951	2	0	0	1	2	5	2.5
1177	1	0	0	2	0	3	3
2863	2	0	0	0	0	2	1
1893	4	0	0	2	2	8	2
371	3	0	0	0	2	5	1.7
2638	3	0	0	3	0	6	2
3038	6	0	0	0	6	12	2
876	3	0	0	3	6	12	4
1866	3	0	0	3	0	6	2
1448	3	0	0	3	0	6	2
91	1	0	0	0	2	3	3
1667	2	0	0	0	2	4	2
2940	1	0	0	1	0	2	2
2851	1	0	0	1	0	2	2
2721	1	0	0	1	0	2	2
2913	1	0	0	2	0	3	3
2106	1	0	0	4	0	5	5
139	3	0	0	2	0	5	1.7
1166	4	0	0	5	1	10	2.5
2446	4	0	0	5	0	9	2.3
932	8	0	0	3	3	14	1.8
775	7	0	0	0	0	7	1
1150	2	0	0	2	0	4	2
2406	4	0	0	0	0	4	1
63	1	0	0	3	0	4	4
956	4	0	0	12	0	16	4
2966	1	0	0	3	0	4	4
2243	4	0	0	6	0	10	2.5
1487	1	0	0	1	2	4	4
582	6	0	0	0	2	8	1.3
752	5	0	0	4	2	11	2.2
154	0	0	0	0	3	3	#N/A
617	1	0	0	0	1	2	2
1303	1	0	0	0	0	1	1
700	8	0	0	3	0	11	1.4
1561	3	0	0	0	0	3	1
2935	2	0	0	0	0	2	1
140	5	0	0	0	0	5	1
3030	2	0	0	0	0	2	1
127	1	0	0	0	0	1	1
2654	2	0	0	0	0	2	1
1998	1	0	0	0	0	1	1
1508	3	0	0	0	0	3	1
2006	5	0	0	4	0	9	1.8
268	1	0	0	0	0	1	1
1651	1	0	0	0	3	4	4
2528	1	0	0	0	0	1	1
676	4	0	0	2	2	8	2
151	1	0	0	1	1	3	3
2171	1	0	0	0	1	2	2
576	5	0	0	0	1	6	1.2
1524	1	0	0	1	0	2	2
1484	1	0	0	0	2	3	3
1660	3	0	0	0	1	4	1.3
808	2	0	0	4	0	6	3
2583	5	0	0	2	0	7	1.4
1600	3	0	0	3	0	6	2
684	1	0	0	0	1	2	2
178	2	0	0	0	0	2	1
2087	1	0	0	1	0	2	2
1240	4	0	0	0	2	6	1.5
2277	3	0	0	3	1	7	2.3
815	3	0	0	0	3	6	2
2477	1	0	0	0	0	1	1
2031	3	0	0	0	4	7	2.3
2599	1	0	0	3	1	5	5
2394	1	0	0	1	0	2	2
1144	5	0	0	14	0	19	3.8
2616	1	0	0	2	0	3	3
3004	2	0	0	6	0	8	4
2779	3	0	0	0	5	8	2.7
503	1	0	0	2	3	6	6
117	0	0	0	0	1	1	#N/A
1034	1	0	0	0	1	2	2
1097	2	0	0	0	0	2	1
673	1	0	0	2	1	4	4
1202	3	0	0	7	0	10	3.3
806	2	0	0	0	1	3	1.5
1310	1	0	0	0	3	4	4
1516	3	0	0	0	0	3	1
729	1	0	0	1	1	3	3
1534	3	0	0	0	3	6	2
2590	2	0	0	0	1	3	1.5
589	1	0	0	0	0	1	1
40	2	0	0	0	1	3	1.5
1507	3	0	0	0	3	6	2
602	1	0	0	0	0	1	1
45	2	0	0	0	0	2	1
2083	1	0	0	0	1	2	2
2138	1	0	0	0	0	1	1
1744	1	0	0	0	1	2	2
1036	3	0	0	7	1	11	3.7
2148	1	0	0	0	0	1	1
265	1	0	0	0	0	1	1
1964	1	0	0	0	0	1	1
2829	3	0	0	0	1	4	1.3
2952	4	0	0	0	1	5	1.3
1368	3	0	0	0	2	5	1.7
501	1	0	0	0	1	2	2
2948	1	0	0	1	1	3	3
324	1	0	0	0	1	2	2
1719	3	0	0	0	0	3	1
2945	1	0	0	0	1	2	2
1255	1	0	0	0	0	1	1
2847	2	0	0	0	2	4	2
1533	6	0	0	0	0	6	1
188	6	0	0	4	0	10	1.7
802	4	0	0	3	1	8	2
628	5	0	0	0	2	7	1.4
2810	2	0	0	0	0	2	1
1543	1	0	0	0	2	3	3
2665	2	0	0	0	1	3	1.5
2004	8	0	0	0	0	8	1
1716	1	0	0	1	0	2	2
1960	3	0	0	1	1	5	1.7
825	2	0	0	2	0	4	2
630	1	0	0	1	0	2	2
964	4	0	0	1	0	5	1.3
1912	6	0	0	0	0	6	1
2663	1	0	0	0	0	1	1
508	4	0	0	0	0	4	1
2013	1	0	0	1	0	2	2
957	4	0	0	6	0	10	2.5
1836	5	0	0	3	0	8	1.6
1409	4	0	0	3	1	8	2
2923	4	0	0	0	0	4	1
1631	2	0	0	1	0	3	1.5
1274	1	0	0	0	2	3	3
1978	5	0	0	5	0	10	2
882	2	0	0	1	0	3	1.5
1198	3	0	0	2	0	5	1.7
1238	3	0	0	3	0	6	2
1947	7	0	0	3	0	10	1.4
2205	5	0	0	5	0	10	2
2452	4	0	0	0	0	4	1
2072	4	0	0	1	0	5	1.3
1405	4	0	0	0	0	4	1
1652	8	0	0	2	2	12	1.5
360	6	0	0	4	0	10	1.7
2514	8	0	0	3	0	11	1.4
2301	2	0	0	2	3	7	3.5
1559	1	0	0	1	0	2	2
2746	3	0	0	3	0	6	2
1502	7	0	0	1	0	8	1.1
2788	2	0	0	2	0	4	2
129	3	0	0	0	0	3	1
513	3	0	0	0	1	4	1.3
3033	3	0	0	0	0	3	1
1172	4	0	0	2	0	6	1.5
661	7	0	0	0	0	7	1
839	4	0	0	4	0	8	2
263	1	0	0	0	0	1	1
316	1	0	0	5	0	6	6
1808	1	0	0	1	0	2	2
638	3	0	0	3	0	6	2
2720	1	0	0	1	0	2	2
2977	5	0	0	20	0	25	5
561	1	0	0	1	0	2	2
267	1	0	0	3	0	4	4

## Sheet: SimResult-StudyOnsiteEstimate
Simulated Onsite Totals
Date:8/24/2016
Iterations:20000
Upper confidence levels reported at:0.025
Lower confidence levels reported at:0.025
Study Onsite Estimate = Total facility emissions including measured and simulated sources
Onsite Device Measurement = Sum of onsite measurements
Sim. Obs. Unmeas. = Sum of all simulated observed/unmeasured methane emissions
Sim. Pneumatic = Sum of all simulated pneumatic methane emissions
Sim. Compressor = Sum of all simulated compressor exhaust methane emissions
Sim. Unloading = Sum of all unloading methane emissions
ID 9999 is aggregated results for all SOEs
Facility ID	Study Onsite Estimate - Mean kgPerHour	Study Onsite Estimate - Upper Confidence kgPerHour	Study Onsite Estimate - Lower Confidence kgPerHour	Onsite Device Measurement - Mean kgPerHour	Onsite Device Measurement - Upper Confidence kgPerHour	Onsite Device Measurement - Lower Confidence kgPerHour	Sim. Obs. Unmeas. - Mean kgPerHour	Sim. Obs. Unmeas. - Upper Confidence kgPerHour	Sim. Obs. Unmeas. - Lower Confidence kgPerHour	Sim. Pneumatic - Mean kgPerHour	Sim. Pneumatic - Upper Confidence kgPerHour	Sim. Pneumatic - Lower Confidence kgPerHour	Sim. Compressor - Mean kgPerHour	Sim. Compressor - Upper Confidence kgPerHour	Sim. Compressor - Lower Confidence kgPerHour	Sim. Unloading - Mean kgPerHour	Sim. Unloading - Upper Confidence kgPerHour	Sim. Unloading - Lower Confidence kgPerHour
37	0.0210575	0.113699	0.0210575	0	0	0	0	0	0	0.0210575	0.113699	0.00180658	0	0	0	0	0	0
40	0.225228	0.159791	0.0519694	0.103936	0	0	0	0	0	0.0752686	0.155742	0.0560177	0.0460234	0	0	0	0	0
45	0.0220458	0.112711	0.0220458	0	0	0	0	0	0	0.0220458	0.112711	0.0027949	0	0	0	0	0	0
63	0.033449	0.15906	0.033449	0	0	0	0	0	0	0.033449	0.15906	0.014198	0	0	0	0	0	0
68	0.011313	0.123443	0.011313	0	0	0	0	0	0	0.011313	0.123443	-0.00793795	0	0	0	0	0	0
73	5.54655	56.4221	5.16154	0.0115436	0	0	0.951388	5.15115	0.855133	0.422632	0.289652	0.191621	0	0	0	4.16099	56.3639	4.14174
91	0.118681	0.170082	0.0801795	0	0	0	0	0	0	0.118681	0.170082	0.0801795	0	0	0	0	0	0
117	0	0	0	0	0	0	0	0	0	0	0	0	0	0	0	0	0	0
127	0.010948	0.123808	0.010948	0	0	0	0	0	0	0.010948	0.123808	-0.00830288	0	0	0	0	0	0
129	0.0324501	0.140808	0.0324501	0	0	0	0	0	0	0.0324501	0.140808	0.0131992	0	0	0	0	0	0
139	0.65892	0.130368	0.0428907	0.636105	0.0184258	0.0200761	0	0	0	0.0228146	0.111942	0.00356369	0	0	0	0	0	0
140	0.110811	0.158702	0.0530582	0.0577755	0	0	0	0	0	0.0530355	0.158725	0.0337846	0	0	0	0	0	0
151	0.0912522	0.139759	0.0527504	0.0319097	0.00659216	0.0126588	0	0	0	0.0593425	0.152418	0.0400916	0	0	0	0	0	0
154	0	0	0	0	0	0	0	0	0	0	0	0	0	0	0	0	0	0
178	0.0339717	0.120036	0.0217081	0.0122636	0	0	0	0	0	0.0217081	0.113048	0.00245719	0	0	0	0	0	0
188	0.0892	0.161062	0.0699491	0.0231507	-0.00389975	0.00389975	0	0	0	0.0660493	0.164962	0.0467984	0	0	0	0	0	0
198	0.0435492	0.14896	0.0435492	0	0	0	0	0	0	0.0435492	0.14896	0.0242983	0	0	0	0	0	0
209	0.139626	0.168389	0.0818732	0.0461374	0	0	0	0	0	0.0934885	0.176024	0.0742376	0	0	0	0	0	0
263	0.0109817	0.123775	0.0109817	0	0	0	0	0	0	0.0109817	0.123775	-0.00826923	0	0	0	0	0	0
265	0.0108492	0.123907	0.0108492	0	0	0	0	0	0	0.0108492	0.123907	-0.00840167	0	0	0	0	0	0
267	0.033567	0.158942	0.033567	0	0	0	0	0	0	0.033567	0.158942	0.0143161	0	0	0	0	0	0
268	0.0108435	0.123913	0.0108435	0	0	0	0	0	0	0.0108435	0.123913	-0.00840741	0	0	0	0	0	0
274	0.42165	0.175128	0.0943848	0.258932	0.0105812	0.00866975	0	0	0	0.129263	0.178751	0.0907614	0.0334555	0	0	0	0	0
286	1.1208	5.078	0.98604	0	0	0	0.988192	5.11435	0.891938	0.0936027	0.156659	0.0743517	0	0	0	0.0390011	-0.0390011	0.0197502
312	0.25645	0.0515646	0.25645	0	0	0	0	0	0	0.085355	0.203409	0.0661041	0	0	0	0.171095	-0.171095	0.151844
316	8.93739	84.1408	8.93739	0	0	0	0	0	0	0.0281887	0.125819	0.00893779	0	0	0	8.9092	84.1305	8.88995
324	0.0658054	0.165206	0.0658054	0	0	0	0	0	0	0.0658054	0.165206	0.0465545	0	0	0	0	0	0
360	0.0856328	0.222382	0.077492	0.00814085	0	0	0	0	0	0.077492	0.230523	0.0582411	0	0	0	0	0	0
371	403.283	550.465	235.685	0	0	0	0.97096	5.13158	0.874705	0.141672	0.204844	0.10317	0.0732157	0.00378791	-0.00378791	402.097	550.9	234.845
390	0.860562	0.198238	0.109776	0.658365	0.0539189	0.0423357	0	0	0	0.135287	0.191978	0.0967853	0.0669097	0	0	0	0	0
435	0.110392	0.139869	0.0526397	0	0	0	0	0	0	0.0445067	0.128752	0.0252558	0.0658858	0.0303688	0.00813301	0	0	0
442	2.92181	0.524103	0.38069	1.54799	0.126844	0.123418	1.31707	0.492511	0.316027	0.0551358	0.156624	0.0358849	0	0	0	0.00161467	-0.00161467	-0.0176362
450	2.49104	43.4416	2.49104	0	0	0	0	0	0	0.0342871	0.138971	0.0150362	0	0	0	2.45675	43.4374	2.4375
466	0.293186	0.111083	0.0236732	0.231028	0.0192336	0.0192682	0	0	0	0.0160698	0.118687	-0.00318107	0.0460878	0	0	0	0	0
501	0.066261	0.16475	0.066261	0	0	0	0	0	0	0.066261	0.16475	0.04701	0	0	0	0	0	0
503	0.255884	0.206138	0.101877	0	0	0	0	0	0	0.175118	0.19065	0.0981139	0.0807663	-0.00376262	0.0230135	0	0	0
508	0.0449047	0.147604	0.0449047	0	0	0	0	0	0	0.0449047	0.147604	0.0256538	0	0	0	0	0	0
513	0.687647	0.159393	0.0908689	0.602152	0.0331277	0.0246251	0	0	0	0.0854948	0.164767	0.0662439	0	0	0	0	0	0
516	1.11348	-0.689957	1.03647	0.0115156	0	0	0	0	0	0.183877	0.220392	0.106873	0	0	0	0.918084	-0.918084	0.898833
561	0.219807	0.145961	0.0272976	0.197846	0.0139137	0.0053372	0	0	0	0.0219604	0.151298	0.00270948	0	0	0	0	0	0
567	0.0742296	0.195283	0.0742296	0	0	0	0	0	0	0.0742296	0.195283	0.0549787	0	0	0	0	0	0
570	0.340213	0.160311	0.0707001	0.25271	0.0168025	0.0216993	0	0	0	0.0875026	0.162759	0.0682517	0	0	0	0	0	0
574	4.58624	58.499	4.58624	0	0	0	0	0	0	0.0167474	0.118009	-0.00250352	0	0	0	4.56949	58.5158	4.55024
576	0.15184	0.194676	0.0940876	0.0449063	0.0128465	0.00640442	0	0	0	0.106934	0.18183	0.0876831	0	0	0	0	0	0
582	0.904375	0.308433	0.17284	0.665776	0.0272567	0.0304961	0	0	0	0.238599	0.319678	0.161595	0	0	0	0	0	0
589	0.0106285	0.124128	0.0106285	0	0	0	0	0	0	0.0106285	0.124128	-0.0086224	0	0	0	0	0	0
593	0.0055571	0.0329447	0.0055571	0	0	0	0	0	0	0.0055571	0.0329447	-0.0136938	0	0	0	0	0	0
597	0.050263	0.122995	0.0310121	0.0231456	-0.0038947	0.0038947	0	0	0	0.0271174	0.12689	0.0078665	0	0	0	0	0	0
602	0.010998	0.123758	0.010998	0	0	0	0	0	0	0.010998	0.123758	-0.0082529	0	0	0	0	0	0
614	0.199436	0.12783	0.0261776	0.177394	0.0151147	0.0233871	0	0	0	0.0220414	0.112715	0.0027905	0	0	0	0	0	0
617	0.0645195	0.147241	0.0645195	0	0	0	0	0	0	0.0645195	0.147241	0.0452686	0	0	0	0	0	0
628	0.162152	0.222866	0.104399	0	0	0	0	0	0	0.162152	0.222866	0.104399	0	0	0	0	0	0
630	0.00565451	0.0328473	0.00565451	0	0	0	0	0	0	0.00565451	0.0328473	-0.0135964	0	0	0	0	0	0
638	4.18715	69.3128	4.18715	0	0	0	0	0	0	0.0168278	0.117929	-0.00242315	0	0	0	4.17032	69.2912	4.15107
653	0.206688	0.216832	0.110433	0	0	0	0.130607	0.177408	0.0536032	0.076081	0.15493	0.0568301	0	0	0	0	0	0
655	1.28667	1.52396	0.516634	0.49668	0.0230945	0.0346583	0	0	0	0.435678	0.315108	0.204667	0.0410951	0	0	0.313218	1.59262	0.293967
656	0.27666	0.262365	0.122653	0.144794	0.00921356	0.0100374	0	0	0	0.105832	0.259935	0.086581	0.0260346	0.0509691	0.00678367	0	0	0
661	0.0833227	0.205441	0.0752142	0.00810843	0	0	0	0	0	0.0752142	0.194299	0.0559633	0	0	0	0	0	0
673	0.34065	-0.109639	0.34065	0	0	0	0	0	0	0.0661032	0.164908	0.0468523	0	0	0	0.274547	-0.274547	0.255296
676	1.75629	0.226554	0.158464	1.61608	0.0972522	0.114508	0	0	0	0.140211	0.187055	0.101709	0	0	0	0	0	0
684	0.781712	0.161583	0.088679	0.685324	0.0462106	0.050044	0	0	0	0.0651053	0.146655	0.0458544	0.0312825	0.0457211	0.0120316	0	0	0
686	0.0705479	0.141212	0.0705479	0	0	0	0	0	0	0.0705479	0.141212	0.051297	0	0	0	0	0	0
700	0.0823897	0.187123	0.0708031	0.0115866	0	0	0	0	0	0.0708031	0.179459	0.0515522	0	0	0	0	0	0
701	1.62496	0.242378	0.14264	1.55249	0.103093	0.108667	0	0	0	0.0724751	0.216289	0.0532242	0	0	0	0	0	0
714	0.118487	0.170277	0.0799847	0	0	0	0	0	0	0.118487	0.170277	0.0799847	0	0	0	0	0	0
729	0.0611768	0.169834	0.0611768	0	0	0	0	0	0	0.0601844	0.170827	0.0409335	0	0	0	0.000992335	-0.000992335	-0.0182586
752	0.173265	0.192502	0.115512	0	0	0	0	0	0	0.140476	0.18679	0.101974	0.0327896	0	0	0	0	0
765	1.49132	25.1327	1.45282	0	0	0	0	0	0	0.125032	0.182983	0.0865302	0	0	0	1.36629	25.1037	1.34704
770	0.815924	-0.276899	0.71967	0	0	0	0.132363	0.175652	0.0553593	0.10234	0.186424	0.0830888	0	0	0	0.581222	-0.581222	0.561971
775	0.0767145	0.192798	0.0767145	0	0	0	0	0	0	0.0767145	0.192798	0.0574636	0	0	0	0	0	0
787	0.139136	0.168879	0.0813833	0	0	0	0	0	0	0.0930965	0.157165	0.0738456	0.0460396	0	0	0	0	0
790	0.200797	0.126469	0.200797	0	0	0	0	0	0	0.0966735	0.172839	0.0774226	0	0	0	0.104123	-0.104123	0.0848724
792	1.7487	8.37728	1.7487	0	0	0	0	0	0	0.0757367	0.155274	0.0564858	0	0	0	1.67297	8.41451	1.65372
794	0.76387	-0.629114	0.76387	0	0	0	0	0	0	0.0115163	0.12324	-0.00773459	0	0	0	0.752354	-0.752354	0.733103
798	0.0548072	0.137702	0.0355563	0.0230717	-0.00382074	0.00382074	0	0	0	0.0317355	0.141523	0.0124846	0	0	0	0	0	0
802	0.174984	0.152282	0.0594785	0.0924442	0.00381033	0.0154406	0	0	0	0.0825398	0.167722	0.0632889	0	0	0	0	0	0
806	0.123171	0.146342	0.0654182	0	0	0	0	0	0	0.0770552	0.153956	0.0578043	0.0461158	0	0	0	0	0
808	0.0412976	0.11271	0.0220467	0.0183224	0.000928529	-0.000928529	0	0	0	0.0229752	0.111781	0.00372427	0	0	0	0	0	0
815	0.28891	0.230865	0.115651	0.092369	0	0	0	0	0	0.196541	0.22698	0.119537	0	0	0	0	0	0
825	0.0576496	0.115609	0.0191477	0.0461609	0.0115918	0.00765909	0	0	0	0.0114886	0.123268	-0.00776228	0	0	0	0	0	0
839	1.94497	5.38963	1.69471	0	0	0	1.92209	5.27775	1.69108	0.022878	0.111878	0.00362705	0	0	0	0	0	0
843	0.0226509	0.112105	0.0226509	0	0	0	0	0	0	0.0226509	0.112105	0.00339999	0	0	0	0	0	0
844	0.0961632	0.134848	0.0384104	0.04623	0	0	0	0	0	0.0499331	0.142576	0.0306822	0	0	0	0	0	0
876	1.11501	0.27106	0.190962	0.554708	0.0420701	0.0349335	0	0	0	0.341903	0.274126	0.168645	0.218394	0.0126172	0.0258846	0	0	0
881	0.00574402	0.0327578	0.00574402	0	0	0	0	0	0	0.00574402	0.0327578	-0.0135069	0	0	0	0	0	0
882	0.0167184	0.118038	0.0167184	0	0	0	0	0	0	0.0167184	0.118038	-0.00253251	0	0	0	0	0	0
921	4.64647	60.5179	4.60797	0	0	0	0	0	0	0.119578	0.169185	0.0810765	0	0	0	4.52689	60.4257	4.50764
926	0.0342261	0.119781	0.0220334	0.0121927	0	0	0	0	0	0.0220334	0.112723	0.0027825	0	0	0	0	0	0
927	0.0412956	0.131963	0.0290185	0.0122771	0	0	0	0	0	0.0290185	0.124989	0.00976759	0	0	0	0	0	0
932	0.179774	0.185993	0.0835199	0	0	0	0	0	0	0.0706993	0.179563	0.0514484	0.109075	0.083434	0.0128205	0	0	0
956	0.240242	0.298784	0.124737	0.103945	0.01156	0.00769092	0	0	0	0.136297	0.287224	0.117046	0	0	0	0	0	0
957	0.236802	1.55353	0.236802	0	0	0	0	0	0	0.0344561	0.138802	0.0152052	0	0	0	0.202345	1.53024	0.183095
958	0.24685	0.17667	0.0735918	0.1815	0.0110087	0.00824224	0	0	0	0.0653496	0.165661	0.0460987	0	0	0	0	0	0
964	0.0373556	0.135903	0.0373556	0	0	0	0	0	0	0.0373556	0.135903	0.0181047	0	0	0	0	0	0
965	0.0880537	0.219961	0.0880537	0	0	0	0	0	0	0.0880537	0.219961	0.0688028	0	0	0	0	0	0
976	0.074776	0.194737	0.074776	0	0	0	0	0	0	0.074776	0.194737	0.0555251	0	0	0	0	0	0
1034	0.0648795	0.166131	0.0648795	0	0	0	0	0	0	0.0648795	0.166131	0.0456286	0	0	0	0	0	0
1036	0.313173	0.187351	0.0821621	0.216188	0.0148225	0.00442837	0	0	0	0.0942141	0.175299	0.0749632	0	0	0	0.00277051	-0.00277051	-0.0164804
1079	1.01723	10.4371	0.766968	0.236583	0.013679	0.0055719	0	0	0	0.0337718	0.139486	0.0145209	0.0314449	0.0455587	0.012194	0.71543	10.4694	0.696179
1085	0	0	0	0	0	0	0	0	0	0	0	0	0	0	0	0	0	0
1097	0.0304138	0.123593	0.0222268	0.00818709	0	0	0	0	0	0.0222268	0.11253	0.00297584	0	0	0	0	0	0
1144	0.896878	0.315929	0.165344	0.735982	0.0340549	0.0236978	0	0	0	0.160897	0.301125	0.141646	0	0	0	0	0	0
1148	1.39276	5.15255	1.00774	0	0	0	0.976593	5.12595	0.880338	0.332271	0.283759	0.178263	0.0838942	0.0316112	0.00689058	0	0	0
1150	0.0114425	0.123314	0.0114425	0	0	0	0	0	0	0.0114425	0.123314	-0.00780838	0	0	0	0	0	0
1166	6.35573	5.19482	1.19648	5.30526	0.393013	0.396275	0.967846	5.13469	0.871592	0.0826233	0.148388	0.0633724	0	0	0	0	0	0
1172	0.981184	5.15986	0.88493	0	0	0	0.948462	5.15408	0.852208	0.0327217	0.140537	0.0134708	0	0	0	0	0	0
1177	5.70334	36.2059	5.60709	0	0	0	0.97118	5.13136	0.874926	0.01157	0.123186	-0.00768087	0	0	0	4.72059	36.1876	4.70134
1198	0.0684813	0.124028	0.0107286	0	0	0	0	0	0	0.0224224	0.112334	0.00317144	0.046059	0	0	0	0	0
1202	263.749	215.791	187.843	10.6646	0.751241	0.750331	1.90778	5.29206	1.67677	0.0402998	0.132958	0.0210489	0	0	0	251.137	216.256	187.763
1212	0.0112334	0.123523	0.0112334	0	0	0	0	0	0	0.0112334	0.123523	-0.00801748	0	0	0	0	0	0
1234	0.021308	0.113448	0.021308	0	0	0	0	0	0	0.021308	0.113448	0.00205704	0	0	0	0	0	0
1238	0.221257	0.12526	0.0287477	0.203971	0.00778876	0.0114621	0	0	0	0.0172856	0.117471	-0.00196533	0	0	0	0	0	0
1240	0.242098	0.200673	0.107342	0.0896551	0	0	0	0	0	0.152443	0.213324	0.0946903	0	0	0	0	0	0
1255	0.0112713	0.123485	0.0112713	0	0	0	0	0	0	0.0112713	0.123485	-0.00797959	0	0	0	0	0	0
1259	0.0317791	0.141479	0.0317791	0	0	0	0	0	0	0.0317791	0.141479	0.0125282	0	0	0	0	0	0
1274	0.122576	0.166188	0.084074	0.00407873	0	0	0	0	0	0.118497	0.170267	0.0799952	0	0	0	0	0	0
1303	0.0105902	0.124166	0.0105902	0	0	0	0	0	0	0.0105902	0.124166	-0.00866071	0	0	0	0	0	0
1310	0.592171	0.197116	0.110898	0.334794	0.0117226	0.00752835	0	0	0	0.174104	0.191663	0.0971003	0.0832734	-0.00626972	0.00626972	0	0	0
1357	0.0170373	0.117719	0.0170373	0	0	0	0	0	0	0.0170373	0.117719	-0.0022136	0	0	0	0	0	0
1360	0.273239	0.188783	0.0807298	0.0231415	-0.00389063	0.00389063	0	0	0	0.130784	0.177231	0.0922821	0.119313	-0.00380797	0.00380797	0	0	0
1368	0.141333	0.205184	0.102831	0	0	0	0	0	0	0.141333	0.205184	0.102831	0	0	0	0	0	0
1374	0.125798	0.143714	0.0295438	0.092406	0.00384857	0.0154023	0	0	0	0.0333923	0.139866	0.0141414	0	0	0	0	0	0
1405	0.0417982	0.13146	0.0417982	0	0	0	0	0	0	0.0417982	0.13146	0.0225473	0	0	0	0	0	0
1409	0.082016	0.148995	0.082016	0	0	0	0	0	0	0.082016	0.148995	0.062765	0	0	0	0	0	0
1448	0.0168111	0.117945	0.0168111	0	0	0	0	0	0	0.0168111	0.117945	-0.00243977	0	0	0	0	0	0
1484	0.190187	0.175581	0.0746811	0	0	0	0	0	0	0.117655	0.171109	0.0791532	0.0725315	0.00447218	-0.00447218	0	0	0
1487	1.16806	5.12699	0.917797	0	0	0	1.05583	5.14297	0.86332	0.112229	0.157283	0.0737276	0	0	0	0	0	0
1493	0.0977807	0.113979	0.040028	0.0802403	0.0160143	0.0224875	0	0	0	0.0170419	0.117714	-0.00220901	0	0	0	0.000498526	-0.000498526	-0.0187524
1502	0.238447	0.185073	0.0651892	0.169201	0.00405683	0.0151941	0	0	0	0.069246	0.181016	0.0499951	0	0	0	0	0	0
1507	0.509827	0.221708	0.124809	0.315114	0.0314024	0.0263503	0	0	0	0.194713	0.228807	0.117709	0	0	0	0	0	0
1508	0.0730937	0.138666	0.0345919	0.0409168	0.016836	0.00241496	0	0	0	0.032177	0.141081	0.012926	0	0	0	0	0	0
1516	0.0332472	0.140011	0.0332472	0	0	0	0	0	0	0.0332472	0.140011	0.0139963	0	0	0	0	0	0
1524	0.00548988	0.033012	0.00548988	0	0	0	0	0	0	0.00548988	0.033012	-0.013761	0	0	0	0	0	0
1533	0.0652903	0.184972	0.0652903	0	0	0	0	0	0	0.0652903	0.184972	0.0460394	0	0	0	0	0	0
1534	0.227055	0.234967	0.1308	0	0	0	0	0	0	0.19612	0.2274	0.119116	0.0309346	0.046069	0.0116837	0	0	0
1543	0.128794	0.15997	0.0710412	0.0102305	0	0	0	0	0	0.118563	0.1702	0.0800616	0	0	0	0	0	0
1559	0.971169	0.087631	0.0663763	0.877137	0.0661581	0.0493474	0	0	0	0.00593985	0.032562	-0.0133111	0.0880928	0.00816181	0.0110891	0	0	0
1560	0.0212823	0.113474	0.0212823	0	0	0	0	0	0	0.0212823	0.113474	0.00203142	0	0	0	0	0	0
1561	0.0317325	0.141526	0.0317325	0	0	0	0	0	0	0.0317325	0.141526	0.0124816	0	0	0	0	0	0
1566	0.0636583	0.148102	0.0636583	0	0	0	0	0	0	0.0636583	0.148102	0.0444074	0	0	0	0	0	0
1589	0.197077	0.187942	0.100822	0	0	0	0	0	0	0.166755	0.199012	0.109002	0.0303216	0.0466821	0.0110707	0	0	0
1590	1.20437	0.316447	0.164826	1.02586	0.0329441	0.0248087	0	0	0	0.178519	0.322005	0.159268	0	0	0	0	0	0
1600	0.0167708	0.117986	0.0167708	0	0	0	0	0	0	0.0167708	0.117986	-0.00248007	0	0	0	0	0	0
1603	1.21727	5.17403	0.909255	0.0427835	0.0149692	0.00428168	0.939797	5.16274	0.843543	0.172998	0.192769	0.0959943	0.0616907	0	0	0	0	0
1615	10.6778	73.1407	10.6008	0.0808293	0	0	0	0	0	0.0406937	0.132565	0.0214428	0	0	0	10.5562	73.1467	10.537
1631	0.0163366	0.11842	0.0163366	0	0	0	0	0	0	0.0163366	0.11842	-0.00291429	0	0	0	0	0	0
1651	0.171656	0.194112	0.094652	0	0	0	0	0	0	0.171656	0.194112	0.094652	0	0	0	0	0	0
1652	2.76448	0.277162	0.223362	2.58007	0.153559	0.154456	0	0	0	0.184412	0.239108	0.126659	0	0	0	0	0	0
1653	0.251823	0.133195	0.0593143	0.208121	0.0228905	0.0156114	0	0	0	0.0437029	0.129555	0.024452	0	0	0	0	0	0
1660	0.0851615	0.1651	0.0851615	0	0	0	0	0	0	0.0851615	0.1651	0.0659106	0	0	0	0	0	0
1667	0.128363	0.179652	0.089861	0	0	0	0	0	0	0.128363	0.179652	0.089861	0	0	0	0	0	0
1669	3.92928	0.363672	0.348612	3.87469	0.322006	0.332525	0	0	0	0.054588	0.214925	0.0353371	0	0	0	0	0	0
1691	1.06907	5.12972	0.915065	0.0408	-0.00229821	0.00229821	0.97977	5.12277	0.883516	0.0395322	0.133726	0.0202813	0.00897016	0	0	0	0	0
1716	0.00553661	0.0329652	0.00553661	0	0	0	0	0	0	0.00553661	0.0329652	-0.0137143	0	0	0	0	0	0
1719	0.032198	0.14106	0.032198	0	0	0	0	0	0	0.032198	0.14106	0.0129471	0	0	0	0	0	0
1742	0.840748	15.7728	0.840748	0	0	0	0	0	0	0.0214834	0.113273	0.00223253	0	0	0	0.819265	15.7943	0.800014
1744	0.197237	0.207033	0.120233	0	0	0	0.131869	0.176146	0.0548654	0.0653674	0.165644	0.0461165	0	0	0	0	0	0
1798	0.5573	0.308991	0.230035	0.0115235	0	0	0	0	0	0.497555	0.310983	0.208792	0.0482213	0.0672842	0.00971943	0	0	0
1808	0.00569999	0.0328018	0.00569999	0	0	0	0	0	0	0.00569999	0.0328018	-0.0135509	0	0	0	0	0	0
1816	1.5786	4.75495	1.42459	0	0	0	0.969909	5.13263	0.873655	0.138032	0.208485	0.09953	0	0	0	0.470661	1.8202	0.45141
1836	0.0386419	0.134616	0.0386419	0	0	0	0	0	0	0.0386419	0.134616	0.019391	0	0	0	0	0	0
1844	0.0747025	0.19481	0.0747025	0	0	0	0	0	0	0.0747025	0.19481	0.0554516	0	0	0	0	0	0
1856	0.161885	0.165381	0.0656304	0.0122603	0	0	0	0	0	0.0878781	0.162384	0.0686272	0.0617466	0	0	0	0	0
1866	0.0171829	0.117574	0.0171829	0	0	0	0	0	0	0.0171829	0.117574	-0.00206806	0	0	0	0	0	0
1893	0.302888	0.139883	0.168132	0.0123375	0	0	0	0	0	0.151942	0.213825	0.0941897	0.073273	0.00373064	-0.00373064	0.065335	-0.065335	0.046084
1912	0.0634686	0.167542	0.0634686	0	0	0	0	0	0	0.0634686	0.167542	0.0442177	0	0	0	0	0	0
1917	0.342689	4.6818	0.342689	0	0	0	0	0	0	0.0217274	0.113029	0.00247647	0	0	0	0.320962	4.66503	0.301711
1922	2.58019	27.7785	2.58019	0	0	0	0	0	0	0.0443673	0.148142	0.0251164	0	0	0	2.53582	27.8229	2.51657
1925	0.0108322	0.123924	0.0108322	0	0	0	0	0	0	0.0108322	0.123924	-0.00841869	0	0	0	0	0	0
1931	0.0173974	0.0403553	0.00582719	0.0115703	0	0	0	0	0	0.00582719	0.0326746	-0.0134237	0	0	0	0	0	0
1947	0.0593853	0.152375	0.0593853	0	0	0	0	0	0	0.0593853	0.152375	0.0401344	0	0	0	0	0	0
1960	0.209215	0.156553	0.0744585	0.127042	0.00771423	0.0115367	0	0	0	0.0821727	0.148838	0.0629218	0	0	0	0	0	0
1964	0.0554583	0.1178	0.0169565	0.0441137	0.0136391	0.00561183	0	0	0	0.0113446	0.123412	-0.00790629	0	0	0	0	0	0
1978	0.219074	0.127443	0.0265645	0.190365	0.00214371	-0.00214371	0	0	0	0.0287082	0.125299	0.00945726	0	0	0	0	0	0
1998	0.0190932	0.115663	0.0109203	0.00817288	0	0	0	0	0	0.0109203	0.123836	-0.00833063	0	0	0	0	0	0
2004	0.190177	0.271845	0.113173	0.0693507	0	0	0	0	0	0.120826	0.264192	0.101575	0	0	0	0	0	0
2006	0.0506086	0.180402	0.0506086	0	0	0	0	0	0	0.0506086	0.180402	0.0313577	0	0	0	0	0	0
2013	0.0263579	0.0313949	0.00710695	0.0204376	-0.00118669	0.00118669	0	0	0	0.00592026	0.0325816	-0.0133307	0	0	0	0	0	0
2018	1.1457	19.8955	1.1457	0	0	0	0	0	0	0.0340131	0.139245	0.0147622	0	0	0	1.11169	19.7948	1.09244
2031	0.330731	0.246797	0.138221	0.0808976	0	0	0	0	0	0.249833	0.250691	0.134327	0	0	0	0	0	0
2072	0.0378978	0.13536	0.0378978	0	0	0	0	0	0	0.0378978	0.13536	0.0186469	0	0	0	0	0	0
2083	0.0656748	0.165336	0.0656748	0	0	0	0	0	0	0.0656748	0.165336	0.0464239	0	0	0	0	0	0
2087	0.0908857	0.140125	0.0138821	0.0693423	0	0	0	0	0	0.0215434	0.132464	0.00229246	0	0	0	0	0	0
2099	1.93542	29.1163	1.89692	0.0461393	0.0116134	0.00763752	0	0	0	0.0745925	0.19492	0.0553416	0	0	0	1.81469	29.1215	1.79544
2106	0.124941	0.163822	0.0286866	0.0856757	0	0	0	0	0	0.0392655	0.153244	0.0200146	0	0	0	0	0	0
2109	0.0107004	0.124056	0.0107004	0	0	0	0	0	0	0.0107004	0.124056	-0.00855054	0	0	0	0	0	0
2116	0.0860082	0.202756	0.0860082	0	0	0	0	0	0	0.0860082	0.202756	0.0667573	0	0	0	0	0	0
2138	0.0113405	0.123416	0.0113405	0	0	0	0	0	0	0.0113405	0.123416	-0.00791043	0	0	0	0	0	0
2148	0.968579	5.13396	0.872325	0	0	0	0.957786	5.14475	0.861532	0.0107928	0.123964	-0.00845812	0	0	0	0	0	0
2171	0.390727	0.148298	0.0634619	0.24273	0.00753214	0.0117188	0	0	0	0.0647253	0.147035	0.0454744	0.0832724	-0.0062687	0.0062687	0	0	0
2186	0.0105702	0.124186	0.0105702	0	0	0	0	0	0	0.0105702	0.124186	-0.00868072	0	0	0	0	0	0
2192	0.0640158	0.147744	0.0640158	0	0	0	0	0	0	0.0640158	0.147744	0.0447649	0	0	0	0	0	0
2205	0.0295939	0.124413	0.0295939	0	0	0	0	0	0	0.0295939	0.124413	0.010343	0	0	0	0	0	0
2207	0.114653	0.36662	0.0569002	0	0	0	0	0	0	0.0233465	0.11141	0.00409558	0.0460511	0	0	0.0452553	0.378265	0.0260044
2243	1.90582	0.308031	0.192492	1.75171	0.0963808	0.115379	0	0	0	0.122631	0.281638	0.10338	0.0314861	0.0455176	0.0122352	0	0	0
2244	0.0530904	0.15867	0.0530904	0	0	0	0	0	0	0.0530904	0.15867	0.0338395	0	0	0	0	0	0
2277	0.0714002	0.159611	0.0714002	0	0	0	0	0	0	0.0714002	0.159611	0.0521493	0	0	0	0	0	0
2282	0.142869	0.145894	0.0466149	0.103991	0	0	0	0	0	0.0321382	0.14112	0.0128873	0	0	0	0.00674024	0.0895143	-0.0125107
2283	0.0108918	0.123865	0.0108918	0	0	0	0	0	0	0.0108918	0.123865	-0.00835912	0	0	0	0	0	0
2301	1.84549	0.214362	0.151405	1.67288	0.0982058	0.0943033	0	0	0	0.172608	0.19316	0.0956039	0	0	0	0	0	0
2394	0.0486366	0.143873	0.0293857	0.026438	0.0120638	0.00718708	0	0	0	0.0221986	0.15106	0.00294771	0	0	0	0	0	0
2399	0.173044	0.192723	0.0960407	0	0	0	0	0	0	0.173044	0.192723	0.0960407	0	0	0	0	0	0
2402	0.0568857	0.116372	-0.000867004	0	0	0	0	0	0	0.0108136	0.123943	-0.0084373	0.0460721	0	0	0	0	0
2406	0.0426314	0.130627	0.0426314	0	0	0	0	0	0	0.0426314	0.130627	0.0233805	0	0	0	0	0	0
2425	0.148012	0.0252457	0.148012	0	0	0	0	0	0	0.0334759	0.139782	0.014225	0	0	0	0.114537	-0.114537	0.0952857
2443	0.193611	0.210658	0.116607	0	0	0	0	0	0	0.193611	0.210658	0.116607	0	0	0	0	0	0
2446	8.81458	2.67822	1.71099	1.70883	0.139258	0.130254	7.06615	2.67481	1.69515	0.0395944	0.133664	0.0203435	0	0	0	0	0	0
2452	0.043204	0.149305	0.043204	0	0	0	0	0	0	0.043204	0.149305	0.0239531	0	0	0	0	0	0
2477	0.222494	0.162524	0.029985	0.19561	0.0161497	0.00310124	0	0	0	0.0268837	0.146374	0.00763283	0	0	0	0	0	0
2514	0.178438	0.187329	0.0629328	0.0693324	0	0	0	0	0	0.070992	0.17927	0.0517411	0.0381139	0	0	0	0	0
2527	0.10787	0.123141	0.0956156	0.0122541	0	0	0	0	0	0.0216971	0.113059	0.00244614	0.0739185	0.00308512	0.0546676	0	0	0
2528	0.0404015	0.113606	0.0404015	0	0	0	0	0	0	0.0113982	0.123358	-0.00785275	0.0290033	0	0	0	0	0
2579	0.164484	0.162782	0.0874803	0	0	0	0	0	0	0.118388	0.170375	0.0798864	0.0460957	0	0	0	0	0
2583	0.269143	0.135126	0.0573828	0.0693614	0.00764228	0.0116086	0	0	0	0.0431247	0.130134	0.0238738	0.156657	0.0166014	0.0219004	0	0	0
2590	0.0769678	0.154043	0.0769678	0	0	0	0	0	0	0.0769678	0.154043	0.0577169	0	0	0	0	0	0
2594	0.119395	0.18862	0.107811	0.0115834	0	0	0	0	0	0.0711696	0.179092	0.0519187	0	0	0	0.0366415	-0.0366415	0.0173906
2599	19.7066	24.0123	16.8382	0.115464	4.12526e-05	-4.12526e-05	0	0	0	0.0712275	0.159783	0.0519766	0	0	0	19.5199	24.0257	16.844
2616	0.0282363	0.164273	0.0282363	0	0	0	0	0	0	0.0282363	0.164273	0.00898538	0	0	0	0	0	0
2638	0.178265	0.110499	0.0242573	0.161172	0.0120864	0.00716449	0	0	0	0.0170929	0.117664	-0.00215806	0	0	0	0	0	0
2654	0.122412	0.12785	0.026157	0.099977	-0.00372243	0.00372243	0	0	0	0.0224346	0.112322	0.00318365	0	0	0	0	0	0
2663	0.0235135	0.111243	0.0112631	0.0122504	0	0	0	0	0	0.0112631	0.123493	-0.00798784	0	0	0	0	0	0
2665	0.0868784	0.144133	0.0753508	0.0115276	0	0	0	0	0	0.0753508	0.15566	0.0560998	0	0	0	0	0	0
2687	0.0988323	0.15143	0.0410796	0	0	0	0	0	0	0.0653456	0.146414	0.0460947	0.0334868	0	0	0	0	0
2720	0.156894	0.151121	0.0221376	0.13457	0.000185967	-0.000185967	0	0	0	0.0223236	0.150935	0.00307264	0	0	0	0	0	0
2721	0.132714	0.15605	0.0364592	0	0	0	0	0	0	0.0226845	0.150574	0.00343356	0.110029	0.00547621	0.0137747	0	0	0
2746	0.0368718	0.136386	0.0368718	0	0	0	0	0	0	0.017354	0.117402	-0.00189692	0.0195178	0	0	0	0	0
2772	0.0109144	0.123842	0.0109144	0	0	0	0	0	0	0.0109144	0.123842	-0.00833654	0	0	0	0	0	0
2779	0.303472	0.254805	0.149465	0	0	0	0	0	0	0.303472	0.254805	0.149465	0	0	0	0	0	0
2785	0.160611	0.166654	0.0836078	0	0	0	0	0	0	0.119515	0.169249	0.0810127	0.0410969	0	0	0	0	0
2788	0.108569	0.122442	0.0123148	0.050989	0	0	0	0	0	0.0114657	0.123291	-0.00778526	0.0461147	0	0	0	0	0
2790	0.979379	18.3485	0.979379	0	0	0	0	0	0	0.010649	0.124107	-0.00860187	0	0	0	0.96873	18.3399	0.949479
2802	0.19176	0.231761	0.134007	0	0	0	0	0	0	0.19176	0.231761	0.134007	0	0	0	0	0	0
2810	0.021342	0.113414	0.021342	0	0	0	0	0	0	0.021342	0.113414	0.00209107	0	0	0	0	0	0
2829	16.2183	191.114	16.2183	0	0	0	0	0	0	0.0865149	0.163747	0.067264	0	0	0	16.1318	191.143	16.1125
2836	0.424188	0.191841	0.0969227	0.207842	0.00391831	0.0153326	0	0	0	0.130056	0.177959	0.0915538	0.0862909	0.00996368	0.00928723	0	0	0
2847	0.238198	0.185322	0.0841904	0.108113	0	0	0	0	0	0.130085	0.17793	0.091583	0	0	0	0	0	0
2850	0.0384622	0.134796	0.0384622	0	0	0	0	0	0	0.0384622	0.134796	0.0192113	0	0	0	0	0	0
2851	0.0473556	0.145153	0.0281047	0.0245229	0.013979	0.00527194	0	0	0	0.0228328	0.150425	0.00358187	0	0	0	0	0	0
2859	0.173006	0.192761	0.0960027	0	0	0	0	0	0	0.173006	0.192761	0.0960027	0	0	0	0	0	0
2861	0	0	0	0	0	0	0	0	0	0	0	0	0	0	0	0	0	0
2863	0.0220944	0.112662	0.0220944	0	0	0	0	0	0	0.0220944	0.112662	0.0028435	0	0	0	0	0	0
2890	0.0313173	0.141941	0.0313173	0	0	0	0	0	0	0.0313173	0.141941	0.0120664	0	0	0	0	0	0
2898	2.61702	36.2891	2.48227	0.0346395	0.00386237	0.0153885	0	0	0	0.114256	0.174508	0.0757537	0.0560541	0.00169867	-0.00169867	2.41208	36.3208	2.39282
2913	0.322997	0.158276	0.0342335	0.295683	0.0123319	0.0261699	0	0	0	0.0273145	0.145944	0.00806362	0	0	0	0	0	0
2914	0.0097828	0.028719	0.00567335	0.00410945	0	0	0	0	0	0.00567335	0.0328285	-0.0135776	0	0	0	0	0	0
2922	0.900871	0.196431	0.111584	0.681346	0.0501892	0.0460654	0	0	0	0.1364	0.190865	0.0978984	0.0831253	-0.00612169	0.00612169	0	0	0
2923	0.331048	0.150225	0.0615352	0.288888	0.019127	0.0193748	0	0	0	0.0421603	0.131098	0.0229094	0	0	0	0	0	0
2935	0.344561	0.11746	0.0365469	0.323338	0.0231784	0.0153234	0	0	0	0.0212234	0.113533	0.00197253	0	0	0	0	0	0
2940	0.0224248	0.150833	0.0224248	0	0	0	0	0	0	0.0224248	0.150833	0.00317393	0	0	0	0	0	0
2945	0.0646292	0.166382	0.0646292	0	0	0	0	0	0	0.0646292	0.166382	0.0453783	0	0	0	0	0	0
2948	0.0599592	0.171052	0.0599592	0	0	0	0	0	0	0.0599592	0.171052	0.0407083	0	0	0	0	0	0
2951	12.0565	4.51851	2.83534	0.102022	0	0	11.7869	4.49942	2.81593	0.126575	0.18144	0.0880731	0.0410729	0	0	0	0	0
2952	0.0972113	0.172301	0.0972113	0	0	0	0	0	0	0.0972113	0.172301	0.0779604	0	0	0	0	0	0
2966	0.212604	0.172415	0.0585963	0.146913	0.0070939	0.012157	0	0	0	0.0342019	0.158307	0.014951	0.0314883	0.0455153	0.0122374	0	0	0
2977	0.846513	0.327793	0.172731	0.648741	0.025041	0.0327118	0	0	0	0.197772	0.322003	0.178521	0	0	0	0	0	0
3002	1.07107	5.12772	0.917063	0.011531	0	0	0.973054	5.12949	0.876799	0.0864859	0.163776	0.067235	0	0	0	0	0	0
3004	0.0975754	0.210439	0.0590736	0.0306446	0.00785726	0.0113937	0	0	0	0.0669308	0.221833	0.0476799	0	0	0	0	0	0
3015	0.017518	0.117238	0.017518	0	0	0	0	0	0	0.017518	0.117238	-0.00173287	0	0	0	0	0	0
3030	0.0557604	0.213752	0.0557604	0	0	0	0	0	0	0.0557604	0.213752	0.0365095	0	0	0	0	0	0
3033	0.0374102	0.135848	0.0313045	0.00610569	0	0	0	0	0	0.0313045	0.141954	0.0120536	0	0	0	0	0	0
3038	0.405832	0.306451	0.194072	0.0183976	0.000853287	-0.000853287	0	0	0	0.387435	0.305598	0.194926	0	0	0	0	0	0
9999	858.128	1512.79	455.265	48.7345	49.7251	47.723	37.0456	52.8823	24.3332	18.6511	20.8295	16.6328	2.90188	3.0994	2.73363	750.795	1404.85	349.077

## Sheet: SimResult-GHGRPFacilityEstimate
Simulated Onsite Totals
Date:8/24/2016
Iterations:20000
Upper confidence levels reported at:0.025
Lower confidence levels reported at:0.025
RPSEA ID 9999 is aggregated results for all SOEs
Facility ID	SubW Total - MeankgPerHour	SubW Total - Upper ConfidencekgPerHour	SubW Total - Lower ConfidencekgPerHour	SubW Pneumatics (a) & (c) - MeankgPerHour	SubW Pneumatics (a) & (c) - Upper ConfidencekgPerHour	SubW Pneumatics (a) & (c) - Lower ConfidencekgPerHour	SubW Unloading (f) - MeankgPerHour	SubW Unloading (f) - Upper ConfidencekgPerHour	SubW Unloading (f) - Lower ConfidencekgPerHour	SubW Population (r) - MeankgPerHour	SubW Population (r) - Upper ConfidencekgPerHour	SubW Population (r) - Lower ConfidencekgPerHour	SubW Combustion (z) - MeankgPerHour	SubW Combustion (z) - Upper ConfidencekgPerHour	SubW Combustion (z) - Lower ConfidencekgPerHour
574	2.69146	2.69146	2.69146	0.756024	0.756024	0.756024	1.72549	1.72549	1.72549	0.209951	0.209951	0.209951	0	0	0
1931	0.461959	0.461959	0.461959	0.252008	0.252008	0.252008	0	0	0	0.209951	0.209951	0.209951	0	0	0
1603	1.7155	2.50262	1.50157	1.21012	2.0021	1.00105	0	0	0	0.44779	0.44779	0.44779	0.0575906	0.0575906	0.0575906
68	0.678588	1.46307	0.462022	0.468638	1.25131	0.269513	0	0	0	0.209951	0.209951	0.209951	0	0	0
2186	0.679104	1.46307	0.462022	0.469153	1.25131	0.269513	0	0	0	0.209951	0.209951	0.209951	0	0	0
2109	0.678825	1.46307	0.462022	0.468874	1.25131	0.269513	0	0	0	0.209951	0.209951	0.209951	0	0	0
765	2.3045	2.3045	2.3045	1.25257	1.25257	1.25257	0.841977	0.841977	0.841977	0.209951	0.209951	0.209951	0	0	0
2772	0.679062	1.46307	0.462022	0.469112	1.25131	0.269513	0	0	0	0.209951	0.209951	0.209951	0	0	0
2579	1.4596	2.23311	1.25131	0.967299	1.75183	0.750786	0	0	0	0.44779	0.44779	0.44779	0.0445107	0.0445107	0.0445107
770	3.31596	4.71647	2.46412	2.12488	3.52292	1.27056	0.141321	0.141321	0.141321	1.04975	1.04975	1.04975	0	0	0
1742	1.95549	3.02239	1.54007	0.937185	2.0021	0.519775	0.598407	0.598407	0.598407	0.419901	0.419901	0.419901	0	0	0
686	1.14335	1.92509	0.924044	0.723446	1.50157	0.519775	0	0	0	0.419901	0.419901	0.419901	0	0	0
2443	2.03636	3.1379	1.38607	1.4065	2.50262	0.770037	0	0	0	0.629852	0.629852	0.629852	0	0	0
1566	0.92787	1.71333	0.712284	0.717919	1.50157	0.500524	0	0	0	0.209951	0.209951	0.209951	0	0	0
714	1.17764	1.96359	0.962546	0.967688	1.75183	0.750786	0	0	0	0.209951	0.209951	0.209951	0	0	0
516	3.1761	3.94644	2.96464	1.72156	2.50262	1.50157	1.03464	1.03464	1.03464	0.419901	0.419901	0.419901	0	0	0
1856	2.36355	3.42666	1.94434	1.43649	2.50262	1.0203	0	0	0	0.867692	0.867692	0.867692	0.0593654	0.0593654	0.0593654
1917	1.91619	2.98389	1.48232	0.939035	2.0021	0.519775	0.557258	0.557258	0.557258	0.419901	0.419901	0.419901	0	0	0
1798	3.26058	4.04269	3.04164	2.70559	3.48442	2.50262	0	0	0	0.44779	0.44779	0.44779	0.107196	0.115505	0.0962546
2282	2.96055	4.25445	2.0021	1.41169	2.50262	0.770037	0.919	1.44382	0.519775	0.629852	0.629852	0.629852	0	0	0
1374	2.28096	3.34966	1.84809	1.44115	2.50262	1.0203	0	0	0	0.839803	0.839803	0.839803	0	0	0
2836	2.16775	3.23415	1.73258	1.43746	2.50262	1.00105	0	0	0	0.657741	0.657741	0.657741	0.0725556	0.0725556	0.0725556
1357	1.14267	1.92509	0.924044	0.722769	1.50157	0.519775	0	0	0	0.419901	0.419901	0.419901	0	0	0
286	3.14163	3.92719	2.92614	1.97752	2.75288	1.77108	0.324299	0.324299	0.324299	0.839803	0.839803	0.839803	0	0	0
1589	1.49989	1.49989	1.49989	0.996832	0.996832	0.996832	0	0	0	0.44779	0.44779	0.44779	0.0552695	0.0552695	0.0552695
2914	0.461959	0.461959	0.461959	0.252008	0.252008	0.252008	0	0	0	0.209951	0.209951	0.209951	0	0	0
570	2.0712	3.1379	1.65558	1.44135	2.50262	1.0203	0	0	0	0.629852	0.629852	0.629852	0	0	0
656	3.43398	4.04269	3.29191	2.53381	3.1379	2.42562	0	0	0	0.845625	0.84704	0.827789	0.0545479	0.0577527	0.0192509
1590	5.27552	5.87153	5.13999	4.25242	4.85123	4.1197	0	0	0	1.0231	1.03955	1.0203	0	0	0
701	2.2076	2.81063	2.09835	1.79832	2.40636	1.69408	0	0	0	0.409282	0.409282	0.409282	0	0	0
2192	0.928067	1.71333	0.712284	0.718116	1.50157	0.500524	0	0	0	0.209951	0.209951	0.209951	0	0	0
2687	1.19574	1.98284	0.981797	0.7159	1.50157	0.500524	0	0	0	0.44779	0.44779	0.44779	0.0320502	0.0320502	0.0320502
1925	0.677639	1.46307	0.462022	0.467689	1.25131	0.269513	0	0	0	0.209951	0.209951	0.209951	0	0	0
2283	0.674789	1.46307	0.462022	0.464838	1.25131	0.269513	0	0	0	0.209951	0.209951	0.209951	0	0	0
2402	1.20609	1.20609	1.20609	0.504016	0.504016	0.504016	0	0	0	0.657741	0.657741	0.657741	0.0443289	0.0443289	0.0443289
921	2.33158	2.33158	2.33158	1.00057	1.00057	1.00057	1.12106	1.12106	1.12106	0.209951	0.209951	0.209951	0	0	0
2785	1.45137	2.23311	1.23206	0.969799	1.75183	0.750786	0	0	0	0.44779	0.44779	0.44779	0.0337774	0.0337774	0.0337774
2859	1.42371	2.21386	1.21281	1.21376	2.0021	1.00105	0	0	0	0.209951	0.209951	0.209951	0	0	0
2861	0	0	0	0	0	0	0	0	0	0	0	0	0	0	0
843	1.35864	2.42562	0.924044	0.938737	2.0021	0.519775	0	0	0	0.419901	0.419901	0.419901	0	0	0
792	1.85919	2.92614	1.44382	1.18347	2.25236	0.770037	0.255818	0.255818	0.255818	0.419901	0.419901	0.419901	0	0	0
2425	1.94036	2.71438	1.73258	1.47852	2.25236	1.27056	0.0419345	0.0419345	0.0419345	0.419901	0.419901	0.419901	0	0	0
1691	2.98793	4.06194	2.56037	1.69581	2.75288	1.27056	0	0	0	1.28759	1.28759	1.28759	0.00452232	0.00452232	0.00452232
958	4.08597	5.79453	2.77213	2.82626	4.52396	1.52082	0	0	0	1.2597	1.2597	1.2597	0	0	0
655	4.63002	5.40951	4.40846	2.73415	3.52292	2.52187	0.14878	0.14878	0.14878	1.70749	1.70749	1.70749	0.0395941	0.0395941	0.0395941
274	2.12634	3.19565	1.69408	1.43629	2.50262	1.00105	0	0	0	0.657741	0.657741	0.657741	0.0323089	0.0323089	0.0323089
1079	3.59454	4.36996	3.36891	1.47854	2.25236	1.27056	0.971486	0.971486	0.971486	1.07764	1.07764	1.07764	0.0668734	0.0668734	0.0668734
2207	4.09955	4.09955	4.09955	1.00803	1.00803	1.00803	2.38928	2.38928	2.38928	0.657741	0.657741	0.657741	0.0444944	0.0444944	0.0444944
844	3.67089	4.73572	3.23415	2.20123	3.27266	1.77108	0	0	0	1.46966	1.46966	1.46966	0	0	0
2790	1.10269	1.88659	0.885542	0.471453	1.25131	0.269513	0.42129	0.42129	0.42129	0.209951	0.209951	0.209951	0	0	0
1212	0.679599	1.46307	0.462022	0.469648	1.25131	0.269513	0	0	0	0.209951	0.209951	0.209951	0	0	0
1493	1.14597	1.92509	0.943295	0.71913	1.50157	0.519775	0.00693494	0.00693494	0.00693494	0.419901	0.419901	0.419901	0	0	0
442	3.88716	4.98599	3.2534	2.41473	3.52292	1.77108	0.00277723	0.00277723	0.00277723	1.46966	1.46966	1.46966	0	0	0
2099	5.5251	7.27685	4.2737	3.28618	5.02449	2.02135	0.769259	0.769259	0.769259	1.46966	1.46966	1.46966	0	0	0
1922	4.29277	5.39026	3.65767	1.91252	3.02239	1.27056	1.54044	1.54044	1.54044	0.839803	0.839803	0.839803	0	0	0
1816	5.75865	6.87258	5.12074	3.67137	4.77423	3.04164	0.407672	0.407672	0.407672	1.67961	1.67961	1.67961	0	0	0
2399	1.42653	2.21386	1.21281	1.21658	2.0021	1.00105	0	0	0	0.209951	0.209951	0.209951	0	0	0
794	1.12302	1.12302	1.12302	0.504016	0.504016	0.504016	0.1991	0.1991	0.1991	0.419901	0.419901	0.419901	0	0	0
787	3.30956	4.08119	3.0994	1.9787	2.75288	1.77108	0	0	0	1.28759	1.28759	1.28759	0.0432634	0.0432634	0.0432634
1259	2.04092	3.1379	1.38607	1.41107	2.50262	0.770037	0	0	0	0.629852	0.629852	0.629852	0	0	0
3015	1.38588	1.38588	1.38588	0.756024	0.756024	0.756024	0	0	0	0.629852	0.629852	0.629852	0	0	0
1560	1.35488	2.42562	0.924044	0.934975	2.0021	0.519775	0	0	0	0.419901	0.419901	0.419901	0	0	0
1669	1.39796	2.40636	0.904793	0.988813	1.98284	0.500524	0	0	0	0.409146	0.409146	0.409146	0	0	0
2018	3.10268	3.88868	2.88764	1.47746	2.25236	1.27056	0.995369	0.995369	0.995369	0.629852	0.629852	0.629852	0	0	0
1085	0	0	0	0	0	0	0	0	0	0	0	0	0	0	0
965	2.94007	3.52292	2.81063	2.53086	3.11865	2.40636	0	0	0	0.409212	0.409212	0.409212	0	0	0
881	0.461959	0.461959	0.461959	0.252008	0.252008	0.252008	0	0	0	0.209951	0.209951	0.209951	0	0	0
2898	3.0125	3.0125	3.0125	0.748557	0.748557	0.748557	1.76363	1.76363	1.76363	0.44779	0.44779	0.44779	0.0525185	0.0525185	0.0525185
73	5.66895	6.73782	5.2555	3.18339	4.25445	2.77213	1.64576	1.64576	1.64576	0.839803	0.839803	0.839803	0	0	0
3002	2.03438	3.1379	1.38607	1.40453	2.50262	0.770037	0	0	0	0.629852	0.629852	0.629852	0	0	0
653	1.35754	2.42562	0.943295	0.936719	2.0021	0.519775	0	0	0	0.420824	0.420824	0.420824	0	0	0
2527	1.65304	2.71438	1.21281	0.940176	2.0021	0.519775	0	0	0	0.659186	0.659186	0.659186	0.0536805	0.0536805	0.0536805
614	1.35837	2.42562	0.943295	0.937541	2.0021	0.519775	0	0	0	0.420824	0.420824	0.420824	0	0	0
926	1.3912	2.1561	1.17431	0.972986	1.75183	0.770037	0	0	0	0.418215	0.418215	0.418215	0	0	0
927	2.30052	2.30052	2.30052	1.25498	1.25498	1.25498	0	0	0	1.04554	1.04554	1.04554	0	0	0
1844	4.73748	6.46831	3.48442	3.27373	5.00524	2.02135	0	0	0	1.46375	1.46375	1.46375	0	0	0
1148	4.60193	6.3143	3.31116	2.80057	4.50471	1.52082	0	0	0	1.72841	1.72841	1.72841	0.0729485	0.0729485	0.0729485
209	2.97704	3.75393	2.77213	1.7224	2.50262	1.52082	0	0	0	1.25465	1.25465	1.25465	0	0	0
1234	1.35163	2.42562	0.924044	0.933414	2.0021	0.519775	0	0	0	0.418215	0.418215	0.418215	0	0	0
450	3.04827	3.83093	2.82988	1.474	2.25236	1.27056	0.737839	0.737839	0.737839	0.83643	0.83643	0.83643	0	0	0
2594	4.67681	6.10254	3.59992	3.08943	4.50471	2.02135	0.123629	0.123629	0.123629	1.46375	1.46375	1.46375	0	0	0
390	2.34944	3.40741	1.92509	1.18399	2.25236	0.770037	0	0	0	1.10109	1.10109	1.10109	0.0643566	0.0643566	0.0643566
1653	3.19595	4.25445	2.77213	1.9413	3.00314	1.52082	0	0	0	1.25465	1.25465	1.25465	0	0	0
466	1.41825	2.1946	1.21281	0.718865	1.50157	0.519775	0	0	0	0.6551	0.6551	0.6551	0.0442843	0.0442843	0.0442843
593	0.460104	0.460104	0.460104	0.250996	0.250996	0.250996	0	0	0	0.209108	0.209108	0.209108	0	0	0
312	5.45456	7.21909	3.96569	3.7489	5.50576	2.27161	0.0327952	0.0327952	0.0327952	1.67286	1.67286	1.67286	0	0	0
37	1.34931	2.42562	0.924044	0.931095	2.0021	0.519775	0	0	0	0.418215	0.418215	0.418215	0	0	0
2244	3.37697	4.79348	2.31011	2.33143	3.75393	1.27056	0	0	0	1.04554	1.04554	1.04554	0	0	0
2890	2.02113	3.11865	1.38607	1.39381	2.50262	0.770037	0	0	0	0.627323	0.627323	0.627323	0	0	0
1360	2.18764	2.96464	1.96359	0.971864	1.75183	0.770037	0	0	0	1.10109	1.10109	1.10109	0.114683	0.114683	0.114683
790	3.11174	4.50471	2.25236	2.11367	3.50367	1.25131	0.161637	0.161637	0.161637	0.83643	0.83643	0.83643	0	0	0
1615	5.29231	5.29231	5.29231	1.75697	1.75697	1.75697	2.4898	2.4898	2.4898	1.04554	1.04554	1.04554	0	0	0
198	2.70186	4.08119	1.84809	1.86543	3.2534	1.0203	0	0	0	0.83643	0.83643	0.83643	0	0	0
2922	2.8671	3.63842	2.65663	1.71499	2.48337	1.50157	0	0	0	1.07331	1.07331	1.07331	0.0787971	0.0787971	0.0787971
435	3.72602	4.79348	3.29191	1.93676	3.00314	1.52082	0	0	0	1.72841	1.72841	1.72841	0.060847	0.060847	0.060847
597	1.81148	2.86839	1.38607	1.18416	2.25236	0.770037	0	0	0	0.627323	0.627323	0.627323	0	0	0
798	2.0239	3.11865	1.38607	1.39658	2.50262	0.770037	0	0	0	0.627323	0.627323	0.627323	0	0	0
2850	2.52432	3.58067	2.09835	1.68789	2.75288	1.27056	0	0	0	0.83643	0.83643	0.83643	0	0	0
976	4.97484	6.68007	3.69618	3.30198	5.00524	2.02135	0	0	0	1.67286	1.67286	1.67286	0	0	0
567	4.73379	6.46831	3.48442	3.27004	5.00524	2.02135	0	0	0	1.46375	1.46375	1.46375	0	0	0
2802	5.90103	7.68111	4.42771	4.22817	6.00629	2.77213	0	0	0	1.67286	1.67286	1.67286	0	0	0
2116	5.44391	7.23834	3.96569	3.76062	5.54426	2.29086	0	0	0	1.6833	1.6833	1.6833	0	0	0
2951	1.91801	2.69513	1.71333	1.21909	2.0021	1.0203	0	0	0	0.659186	0.659186	0.659186	0.0397319	0.0397319	0.0397319
1177	6.98667	6.98667	6.98667	0.505123	0.505123	0.505123	6.27114	6.27114	6.27114	0.210412	0.210412	0.210412	0	0	0
2863	1.36533	2.42562	0.943295	0.944508	2.0021	0.519775	0	0	0	0.420824	0.420824	0.420824	0	0	0
1893	3.58296	4.69722	2.94539	2.40807	3.52292	1.77108	0.0249195	0.0249195	0.0249195	1.08001	1.08001	1.08001	0.0699633	0.0699633	0.0699633
371	94.8438	103.57	90.0943	1.41777	2.52187	0.770037	92.486	100.856	88.4002	0.869598	0.869598	0.869598	0.0703573	0.0703573	0.0703573
2638	1.38892	1.38892	1.38892	0.757685	0.757685	0.757685	0	0	0	0.631236	0.631236	0.631236	0	0	0
3038	4.3308	6.04479	3.04164	3.06833	4.79348	1.77108	0	0	0	1.26247	1.26247	1.26247	0	0	0
876	2.80039	2.81063	2.79138	1.25532	1.25532	1.25532	0	0	0	1.34632	1.34632	1.34632	0.198742	0.192509	0.192509
1866	1.38892	1.38892	1.38892	0.757685	0.757685	0.757685	0	0	0	0.631236	0.631236	0.631236	0	0	0
1448	1.38892	1.38892	1.38892	0.757685	0.757685	0.757685	0	0	0	0.631236	0.631236	0.631236	0	0	0
91	1.1832	1.96359	0.962546	0.972789	1.75183	0.750786	0	0	0	0.210412	0.210412	0.210412	0	0	0
1667	1.85631	2.92614	1.42457	1.43548	2.50262	1.0203	0	0	0	0.420824	0.420824	0.420824	0	0	0
2940	0.527013	1.15505	0.442771	0.322386	0.943295	0.250262	0	0	0	0.204627	0.204627	0.204627	0	0	0
2851	0.529435	1.15505	0.442771	0.32477	0.943295	0.250262	0	0	0	0.204664	0.204664	0.204664	0	0	0
2721	0.845089	1.46307	0.693033	0.322436	0.943295	0.250262	0	0	0	0.4364	0.4364	0.4364	0.0862538	0.0962546	0.0192509
2913	0.772585	1.38607	0.693033	0.567977	1.17431	0.481273	0	0	0	0.204608	0.204608	0.204608	0	0	0
2106	1.26446	1.88659	1.15505	1.05981	1.67483	0.962546	0	0	0	0.204651	0.204651	0.204651	0	0	0
139	1.60636	2.38711	1.40532	0.975122	1.75183	0.770037	0	0	0	0.631236	0.631236	0.631236	0	0	0
1166	2.65329	2.73363	2.59887	1.51163	1.51163	1.51163	0	0	0	1.08001	1.08001	1.08001	0.0616541	0.154007	0.0192509
2446	2.57212	3.34966	2.36786	1.73047	2.52187	1.52082	0	0	0	0.841648	0.841648	0.841648	0	0	0
932	5.42906	6.87258	4.35071	3.10109	4.54322	2.02135	0	0	0	2.16002	2.16002	2.16002	0.167946	0.173258	0.154007
775	4.76898	6.50681	3.50367	3.29609	5.04374	2.02135	0	0	0	1.47288	1.47288	1.47288	0	0	0
1150	0.925947	0.925947	0.925947	0.505123	0.505123	0.505123	0	0	0	0.420824	0.420824	0.420824	0	0	0
2406	2.71545	4.1197	1.86734	1.87381	3.27266	1.0203	0	0	0	0.841648	0.841648	0.841648	0	0	0
63	1.01821	1.63633	0.924044	0.813627	1.42457	0.712284	0	0	0	0.204586	0.204586	0.204586	0	0	0
956	3.8436	4.44696	3.71543	3.02503	3.63842	2.90689	0	0	0	0.818571	0.818571	0.818571	0	0	0
2966	1.30555	1.92509	1.17431	0.814798	1.42457	0.712284	0	0	0	0.436384	0.436384	0.436384	0.0543697	0.0577527	0.0192509
2243	3.5703	4.58172	3.04164	2.46553	3.48442	1.94434	0	0	0	1.05017	1.0588	1.03955	0.0546013	0.0577527	0.0192509
1487	0.948054	0.948054	0.948054	0.740393	0.740393	0.740393	0	0	0	0.207661	0.207661	0.207661	0	0	0
582	4.23929	5.89078	2.98389	3.00539	4.65872	1.73258	0	0	0	1.2339	1.23206	1.23206	0	0	0
752	3.24706	4.02344	3.04164	1.95343	2.73363	1.75183	0	0	0	1.27355	1.27355	1.27355	0.0200782	0.0200782	0.0200782
154	0	0	0	0	0	0	0	0	0	0	0	0	0	0	0
617	0.925019	1.69408	0.712284	0.715911	1.50157	0.500524	0	0	0	0.209108	0.209108	0.209108	0	0	0
1303	0.679014	1.46307	0.462022	0.469907	1.25131	0.269513	0	0	0	0.209108	0.209108	0.209108	0	0	0
700	4.75792	6.17954	3.69618	3.08506	4.50471	2.02135	0	0	0	1.67286	1.67286	1.67286	0	0	0
1561	2.03018	3.11865	1.38607	1.40285	2.50262	0.770037	0	0	0	0.627323	0.627323	0.627323	0	0	0
2935	1.34926	2.42562	0.924044	0.931045	2.0021	0.519775	0	0	0	0.418215	0.418215	0.418215	0	0	0
140	3.37369	4.79348	2.31011	2.32815	3.75393	1.27056	0	0	0	1.04554	1.04554	1.04554	0	0	0
3030	1.40112	2.38711	0.904793	0.991859	1.98284	0.500524	0	0	0	0.409261	0.409261	0.409261	0	0	0
127	0.679435	1.46307	0.462022	0.470327	1.25131	0.269513	0	0	0	0.209108	0.209108	0.209108	0	0	0
2654	1.35684	2.42562	0.924044	0.938623	2.0021	0.519775	0	0	0	0.418215	0.418215	0.418215	0	0	0
1998	0.675551	1.46307	0.462022	0.466443	1.25131	0.269513	0	0	0	0.209108	0.209108	0.209108	0	0	0
1508	2.02996	3.11865	1.38607	1.40263	2.50262	0.770037	0	0	0	0.627323	0.627323	0.627323	0	0	0
2006	2.50469	3.27266	2.29086	1.46367	2.23311	1.25131	0	0	0	1.04102	1.04102	1.04102	0	0	0
268	0.669804	1.44382	0.462022	0.462144	1.23206	0.250262	0	0	0	0.207661	0.207661	0.207661	0	0	0
1651	1.40883	2.17535	1.21281	1.20117	1.98284	1.00105	0	0	0	0.207661	0.207661	0.207661	0	0	0
2528	0.932698	1.71333	0.731535	0.466368	1.25131	0.269513	0	0	0	0.445992	0.445992	0.445992	0.0203378	0.0203378	0.0203378
676	2.79943	3.83093	2.32936	1.67316	2.73363	1.25131	0	0	0	1.06589	1.06589	1.06589	0.0603753	0.154007	0.0192509
151	0.707381	0.707381	0.707381	0.498274	0.498274	0.498274	0	0	0	0.209108	0.209108	0.209108	0	0	0
2171	1.22998	2.0021	1.0203	0.70793	1.48232	0.500524	0	0	0	0.442906	0.442906	0.442906	0.0791453	0.0791453	0.0791453
576	3.60287	5.00524	2.54112	2.56457	3.96569	1.50157	0	0	0	1.0383	1.0383	1.0383	0	0	0
1524	0.45692	0.45692	0.45692	0.24926	0.24926	0.24926	0	0	0	0.207661	0.207661	0.207661	0	0	0
1484	1.45913	2.23311	1.25131	0.952917	1.73258	0.750786	0	0	0	0.442906	0.442906	0.442906	0.063303	0.063303	0.063303
1660	2.0121	3.0994	1.38607	1.38912	2.48337	0.750786	0	0	0	0.622983	0.622983	0.622983	0	0	0
808	1.4222	1.4222	1.4222	1.00398	1.00398	1.00398	0	0	0	0.418215	0.418215	0.418215	0	0	0
2583	3.30953	4.40846	2.65663	1.88749	2.98389	1.25131	0	0	0	1.27355	1.27355	1.27355	0.148486	0.154007	0.134756
1600	1.37076	1.37076	1.37076	0.747779	0.747779	0.747779	0	0	0	0.622983	0.622983	0.622983	0	0	0
684	1.23371	2.02135	1.0203	0.718092	1.50157	0.519775	0	0	0	0.448774	0.448774	0.448774	0.0668462	0.0668462	0.0668462
178	1.34802	2.42562	0.924044	0.929802	2.0021	0.519775	0	0	0	0.418215	0.418215	0.418215	0	0	0
2087	0.525631	1.15505	0.442771	0.321046	0.943295	0.250262	0	0	0	0.204585	0.204585	0.204585	0	0	0
1240	3.0288	4.40846	2.13685	1.88431	3.29191	1.0203	0	0	0	1.0834	1.0834	1.0834	0.0610902	0.154007	0.0192509
2277	1.64288	1.64288	1.64288	1.00967	1.00967	1.00967	0	0	0	0.633218	0.633218	0.633218	0	0	0
815	2.60056	3.75393	1.90584	1.66666	2.77213	1.0203	0	0	0	0.872329	0.872329	0.872329	0.0615754	0.154007	0.0192509
2477	0.739917	1.63633	0.442771	0.535278	1.42457	0.250262	0	0	0	0.204639	0.204639	0.204639	0	0	0
2031	2.29968	3.40741	1.65558	1.66647	2.77213	1.0203	0	0	0	0.633218	0.633218	0.633218	0	0	0
2599	23.5915	23.5915	23.5915	1.00967	1.00967	1.00967	22.3707	22.3707	22.3707	0.211073	0.211073	0.211073	0	0	0
2394	0.529255	1.15505	0.442771	0.324646	0.943295	0.250262	0	0	0	0.20461	0.20461	0.20461	0	0	0
1144	4.53776	5.13999	4.40846	3.51453	4.1197	3.38816	0	0	0	1.02322	1.03955	1.0203	0	0	0
2616	0.773882	1.38607	0.693033	0.569287	1.19356	0.481273	0	0	0	0.204596	0.204596	0.204596	0	0	0
3004	1.96064	2.56037	1.84809	1.55134	2.1561	1.44382	0	0	0	0.409293	0.409293	0.409293	0	0	0
2779	2.59678	3.73468	1.90584	1.66302	2.77213	1.0203	0	0	0	0.872329	0.872329	0.872329	0.0614347	0.154007	0.0192509
503	1.7449	1.7449	1.7449	1.25551	1.25551	1.25551	0	0	0	0.450183	0.450183	0.450183	0.0391983	0.0391983	0.0391983
117	0	0	0	0	0	0	0	0	0	0	0	0	0	0	0
1034	0.931718	1.71333	0.731535	0.720645	1.50157	0.519775	0	0	0	0.211073	0.211073	0.211073	0	0	0
1097	1.36304	2.44487	0.943295	0.94089	2.02135	0.519775	0	0	0	0.422145	0.422145	0.422145	0	0	0
673	1.04147	1.04147	1.04147	0.756311	0.756311	0.756311	0.0740833	0.0740833	0.0740833	0.211073	0.211073	0.211073	0	0	0
1202	56.5485	56.5485	56.5485	1.77348	1.77348	1.77348	54.1418	54.1418	54.1418	0.633218	0.633218	0.633218	0	0	0
806	1.89775	2.96464	1.46307	1.19241	2.27161	0.770037	0	0	0	0.661256	0.661256	0.661256	0.0440864	0.0440864	0.0440864
1310	1.7478	2.54112	1.54007	1.21666	2.0021	1.0203	0	0	0	0.450183	0.450183	0.450183	0.0809582	0.0809582	0.0809582
1516	2.04842	3.15715	1.40532	1.4152	2.52187	0.770037	0	0	0	0.633218	0.633218	0.633218	0	0	0
729	1.00761	1.00761	1.00761	0.502956	0.502956	0.502956	0.293584	0.293584	0.293584	0.211073	0.211073	0.211073	0	0	0
1534	2.85333	3.96569	2.1946	1.91685	3.02239	1.27056	0	0	0	0.872329	0.872329	0.872329	0.0641561	0.0641561	0.0641561
2590	1.62099	2.69513	1.19356	1.19884	2.27161	0.770037	0	0	0	0.422145	0.422145	0.422145	0	0	0
589	0.682427	1.46307	0.481273	0.471354	1.25131	0.269513	0	0	0	0.211073	0.211073	0.211073	0	0	0
40	1.64282	2.71438	1.21281	0.93873	2.02135	0.519775	0	0	0	0.661256	0.661256	0.661256	0.0428329	0.0428329	0.0428329
1507	2.30039	3.40741	1.65558	1.66717	2.77213	1.0203	0	0	0	0.633218	0.633218	0.633218	0	0	0
602	0.681629	1.46307	0.481273	0.470556	1.25131	0.269513	0	0	0	0.211073	0.211073	0.211073	0	0	0
45	1.3643	2.44487	0.943295	0.942158	2.02135	0.519775	0	0	0	0.422145	0.422145	0.422145	0	0	0
2083	0.934313	1.71333	0.731535	0.72324	1.50157	0.519775	0	0	0	0.211073	0.211073	0.211073	0	0	0
2138	0.681742	1.46307	0.481273	0.47067	1.25131	0.269513	0	0	0	0.211073	0.211073	0.211073	0	0	0
1744	0.932829	1.71333	0.731535	0.721757	1.50157	0.519775	0	0	0	0.211073	0.211073	0.211073	0	0	0
1036	2.72374	2.72374	2.72374	2.02309	2.02309	2.02309	0.067437	0.067437	0.067437	0.633218	0.633218	0.633218	0	0	0
2148	0.683829	1.46307	0.481273	0.472756	1.25131	0.269513	0	0	0	0.211073	0.211073	0.211073	0	0	0
265	0.685796	1.46307	0.481273	0.474724	1.25131	0.269513	0	0	0	0.211073	0.211073	0.211073	0	0	0
1964	0.682489	1.46307	0.481273	0.471416	1.25131	0.269513	0	0	0	0.211073	0.211073	0.211073	0	0	0
2829	12.9314	14.0532	12.2821	1.41146	2.52187	0.770037	10.8867	10.8867	10.8867	0.633218	0.633218	0.633218	0	0	0
2952	2.9851	4.36996	2.1176	2.14081	3.54217	1.27056	0	0	0	0.844291	0.844291	0.844291	0	0	0
1368	2.54397	3.65767	1.90584	1.91075	3.02239	1.27056	0	0	0	0.633218	0.633218	0.633218	0	0	0
501	0.930949	1.71333	0.731535	0.719876	1.50157	0.519775	0	0	0	0.211073	0.211073	0.211073	0	0	0
2948	0.714029	0.714029	0.714029	0.502956	0.502956	0.502956	0	0	0	0.211073	0.211073	0.211073	0	0	0
324	0.929518	1.71333	0.731535	0.718446	1.50157	0.519775	0	0	0	0.211073	0.211073	0.211073	0	0	0
1719	2.04767	3.15715	1.40532	1.41445	2.52187	0.770037	0	0	0	0.633218	0.633218	0.633218	0	0	0
2945	0.929892	1.71333	0.731535	0.718819	1.50157	0.519775	0	0	0	0.211073	0.211073	0.211073	0	0	0
1255	0.680298	1.46307	0.481273	0.469226	1.25131	0.269513	0	0	0	0.211073	0.211073	0.211073	0	0	0
2847	1.86325	2.94539	1.44382	1.44111	2.52187	1.0203	0	0	0	0.422145	0.422145	0.422145	0	0	0
1533	4.09205	5.81378	2.79138	2.82562	4.54322	1.52082	0	0	0	1.26644	1.26644	1.26644	0	0	0
188	4.16261	5.56351	3.31116	2.89617	4.29295	2.0406	0	0	0	1.26644	1.26644	1.26644	0	0	0
802	2.08006	2.86839	1.86734	1.23577	2.02135	1.0203	0	0	0	0.844291	0.844291	0.844291	0	0	0
628	3.66175	5.10149	2.57962	2.60639	4.04269	1.52082	0	0	0	1.05536	1.05536	1.05536	0	0	0
2810	1.36734	2.44487	0.943295	0.945191	2.02135	0.519775	0	0	0	0.422145	0.422145	0.422145	0	0	0
1543	1.17898	1.96359	0.981797	0.967908	1.75183	0.770037	0	0	0	0.211073	0.211073	0.211073	0	0	0
2665	1.61261	2.69513	1.19356	1.19047	2.27161	0.770037	0	0	0	0.422145	0.422145	0.422145	0	0	0
2004	5.42664	7.23834	3.94644	3.75092	5.56351	2.27161	0	0	0	1.67572	1.67572	1.67572	0	0	0
1716	0.464428	0.464428	0.464428	0.253355	0.253355	0.253355	0	0	0	0.211073	0.211073	0.211073	0	0	0
1960	1.8347	2.90689	1.40532	1.20148	2.27161	0.770037	0	0	0	0.633218	0.633218	0.633218	0	0	0
825	0.920207	0.920207	0.920207	0.501992	0.501992	0.501992	0	0	0	0.418215	0.418215	0.418215	0	0	0
630	0.464428	0.464428	0.464428	0.253355	0.253355	0.253355	0	0	0	0.211073	0.211073	0.211073	0	0	0
964	2.48879	3.58067	1.84809	1.65236	2.75288	1.0203	0	0	0	0.83643	0.83643	0.83643	0	0	0
1912	4.05659	5.75602	2.77213	2.80194	4.50471	1.52082	0	0	0	1.25465	1.25465	1.25465	0	0	0
2663	0.681895	1.46307	0.481273	0.470823	1.25131	0.269513	0	0	0	0.211073	0.211073	0.211073	0	0	0
508	2.73748	4.1197	1.86734	1.89319	3.29191	1.0203	0	0	0	0.844291	0.844291	0.844291	0	0	0
2013	0.460104	0.460104	0.460104	0.250996	0.250996	0.250996	0	0	0	0.209108	0.209108	0.209108	0	0	0
957	2.59615	2.59615	2.59615	1.50598	1.50598	1.50598	0.253741	0.253741	0.253741	0.83643	0.83643	0.83643	0	0	0
1836	2.73209	3.79243	2.31011	1.68656	2.75288	1.27056	0	0	0	1.04554	1.04554	1.04554	0	0	0
1409	2.32385	3.11865	2.1176	1.47956	2.27161	1.27056	0	0	0	0.844291	0.844291	0.844291	0	0	0
2923	2.73409	4.1197	1.86734	1.8898	3.29191	1.0203	0	0	0	0.844291	0.844291	0.844291	0	0	0
1631	1.14407	1.92509	0.943295	0.721922	1.50157	0.519775	0	0	0	0.422145	0.422145	0.422145	0	0	0
1274	1.17086	1.94434	0.962546	0.961753	1.73258	0.750786	0	0	0	0.209108	0.209108	0.209108	0	0	0
1978	2.30052	2.30052	2.30052	1.25498	1.25498	1.25498	0	0	0	1.04554	1.04554	1.04554	0	0	0
882	1.15034	1.92509	0.943295	0.728193	1.50157	0.519775	0	0	0	0.422145	0.422145	0.422145	0	0	0
1198	1.89471	2.67588	1.67483	0.977672	1.77108	0.770037	0	0	0	0.872329	0.872329	0.872329	0.0447135	0.0447135	0.0447135
1238	1.39328	1.39328	1.39328	0.760064	0.760064	0.760064	0	0	0	0.633218	0.633218	0.633218	0	0	0
1947	4.08319	5.46726	3.23415	2.61943	4.00419	1.77108	0	0	0	1.46375	1.46375	1.46375	0	0	0
2205	2.32214	2.32214	2.32214	1.26677	1.26677	1.26677	0	0	0	1.05536	1.05536	1.05536	0	0	0
2452	2.73382	4.1197	1.86734	1.88953	3.29191	1.0203	0	0	0	0.844291	0.844291	0.844291	0	0	0
2072	2.51309	3.61917	1.86734	1.6688	2.77213	1.0203	0	0	0	0.844291	0.844291	0.844291	0	0	0
1405	2.70764	4.08119	1.84809	1.87121	3.2534	1.0203	0	0	0	0.83643	0.83643	0.83643	0	0	0
1652	5.57793	7.23834	4.29295	3.30947	5.00524	2.02135	0	0	0	2.14663	2.14663	2.14663	0.121837	0.250262	0.0385018
360	3.46812	4.50471	3.00314	1.92694	2.98389	1.50157	0	0	0	1.48088	1.48088	1.48088	0.0603008	0.154007	0.0192509
2514	4.99701	6.42981	3.92719	3.08358	4.50471	2.02135	0	0	0	1.90975	1.90975	1.90975	0.00369079	0.00369079	0.00369079
2301	1.71295	1.80959	1.65558	0.996547	0.996547	0.996547	0	0	0	0.6551	0.6551	0.6551	0.0613045	0.154007	0.0192509
1559	0.7818	0.7818	0.7818	0.250996	0.250996	0.250996	0	0	0	0.445992	0.445992	0.445992	0.0848118	0.0848118	0.0848118
2746	1.62821	1.62821	1.62821	0.752988	0.752988	0.752988	0	0	0	0.864207	0.864207	0.864207	0.011013	0.011013	0.011013
1502	4.52253	6.21805	3.23415	3.05878	4.75498	1.77108	0	0	0	1.46375	1.46375	1.46375	0	0	0
2788	1.20031	1.20031	1.20031	0.501992	0.501992	0.501992	0	0	0	0.6551	0.6551	0.6551	0.043217	0.043217	0.043217
129	2.03191	3.11865	1.38607	1.40459	2.50262	0.770037	0	0	0	0.627323	0.627323	0.627323	0	0	0
513	2.57242	3.71543	1.88659	1.64707	2.75288	1.00105	0	0	0	0.864207	0.864207	0.864207	0.0611386	0.154007	0.0192509
3033	2.02855	3.11865	1.38607	1.40122	2.50262	0.770037	0	0	0	0.627323	0.627323	0.627323	0	0	0
1172	2.27372	3.33041	1.84809	1.43729	2.50262	1.0203	0	0	0	0.83643	0.83643	0.83643	0	0	0
661	4.73323	6.46831	3.48442	3.26947	5.00524	2.02135	0	0	0	1.46375	1.46375	1.46375	0	0	0
839	1.84041	1.84041	1.84041	1.00398	1.00398	1.00398	0	0	0	0.83643	0.83643	0.83643	0	0	0
263	0.679618	1.46307	0.462022	0.470511	1.25131	0.269513	0	0	0	0.209108	0.209108	0.209108	0	0	0
316	2.57974	2.57974	2.57974	1.25498	1.25498	1.25498	1.11566	1.11566	1.11566	0.209108	0.209108	0.209108	0	0	0
1808	0.460104	0.460104	0.460104	0.250996	0.250996	0.250996	0	0	0	0.209108	0.209108	0.209108	0	0	0
638	1.88696	1.88696	1.88696	0.752988	0.752988	0.752988	0.506654	0.506654	0.506654	0.627323	0.627323	0.627323	0	0	0
2720	0.524825	1.1358	0.442771	0.320191	0.943295	0.250262	0	0	0	0.204634	0.204634	0.204634	0	0	0
2977	6.0124	6.60306	5.87153	4.98931	5.58276	4.85123	0	0	0	1.02309	1.03955	1.0203	0	0	0
561	0.526637	1.15505	0.442771	0.321996	0.943295	0.250262	0	0	0	0.204641	0.204641	0.204641	0	0	0
267	1.01747	1.63633	0.924044	0.812877	1.42457	0.712284	0	0	0	0.204596	0.204596	0.204596	0	0	0
9999	741.813	756.984	728.108	355.78	368.771	343.225	210.861	219.364	206.466	171.628	171.68	171.564	3.54391	3.86943	3.29191

[truncated: 7 more sheets: Table 1 - TFE vs SOE , Table 2 - OFE vs SOE, Table S1, Table S2, Table S7, Table S8, Table S9]
